# Supplementary material
Source: PubMed Central journal article supplement (PMC3250118)
Supplement: 1112724108_sapp.pdf [file 1112724108_sapp.pdf]

**Dynamics of transcriptional start site selection during nitrogen stress-induced cell differentiation in *Anabaena* sp. PCC7120**

Jan Mitschke<sup>a</sup>, Agustín Vioque<sup>b</sup>, Fabian Haas<sup>a</sup>, Wolfgang R. Hess<sup>a,1</sup> and Alicia M. Muro-Pastor<sup>b</sup>

<sup>a</sup>University of Freiburg, Faculty of Biology, Schänzlestr. 1, D-79104 Freiburg, Germany

<sup>b</sup>Instituto de Bioquímica Vegetal y Fotosíntesis, Consejo Superior de Investigaciones Científicas and Universidad de Sevilla, E-41092 Seville, Spain

<sup>1</sup>Corresponding author: Wolfgang R. Hess; Phone: +49-761-203-2796

Fax: +49-761-203-2445; Email: Wolfgang.Hess@biologie.uni-freiburg.de

**Supplementary Information**

**1. Methods**

**2. Supplementary Data Files: please download from**

**<http://www.cyanolab.de/Supplementary.html>**

**3. Supplementary Figures**

**4. Supplementary Tables**

**5. Supplementary Material References**

## **1. METHODS**

**Growth conditions.** Cultures of *Anabaena* 7120 wild type, *hetR* mutant 216 (1) (bearing point mutation S179N) and *ntcA* mutant CSE2 (2) were grown photoautotrophically at 30°C in BG110C (BG11 (3) lacking NaNO<sub>3</sub> and supplemented with 10 mM NaHCO<sub>3</sub>) containing 6 mM NH<sub>4</sub>Cl plus 12 mM *N*-tris (hydroxymethyl) methyl-2-aminoethanesulfonic acid (TES)-NaOH buffer (pH 7.5), bubbled with a mixture of CO<sub>2</sub> and air (1 % v/v). Four RNA samples were isolated for dRNA-seq analysis from cells taken at T = 0 h (WT-0 and *hetR*-0) and T = 8 h (WT-8 and *hetR*-8) after removing all combined nitrogen from the media.

**Fluorescence microscopy.** Micrographs of filaments subjected to nitrogen step-down on plates were taken four days after plating. The accumulation of GFP was analyzed by laser confocal microscopy as described previously (4). GFP was excited at 488 nm by an argon ion laser, and the fluorescent emission was monitored by collection across windows of 500-540 nm (GFP imaging) and 630-700 nm (cyanobacterial autofluorescence).

**Plasmid construction.** The promoter region of NsiR1 (repeat 6; P6) was amplified using a 99-nt oligonucleotide (REPEAT for the wild-type version, REPEAT\* for the mutated version; **Table S11**) and oligonucleotides Cla-repeat (containing a *Clal* site) and repeat-Sal (containing a *SalI* site) (**Table S11**). The resulting *Clal*-*SalI* fragments were cloned between the *Clal* and *XhoI* sites of promoter-probe pCSAM201 (4), yielding pSAM264 (wild-type version) or pSAM269 (mutated version).

**Preparation and analysis of RNA.** Total RNA was isolated using hot phenol as described (5) with modifications. Frozen pellets corresponding to 50 ml of culture were suspended in 300 µl resuspension buffer (0.3 M sucrose, 10 mM sodium acetate, pH 4.5) and 100 µl 250 mM Na<sub>2</sub>-EDTA (pH 8.0), 400 µl lysis buffer (2%

SDS, 10 mM sodium acetate, pH 4.5) and 1 ml of hot (65 °C) acid phenol were added. Samples were briefly vortexed and incubated at 65 °C for 2.5 min (this was repeated twice). The suspension was centrifuged at 12000 x g for 5 min and the upper phase was collected and sequentially extracted with hot phenol, hot phenol:chloroform (1:1) and chloroform. Finally, one volume of isopropanol was added and the RNA was precipitated in liquid nitrogen. The pellet was washed with 70% ethanol, dissolved in H<sub>2</sub>O and treated with RNase-free DNase, according to the instructions of the Ambion DNA-free™ kit. Northern blot hybridization was carried out according to standard procedures (6) after the separation of RNAs in 1 % denaturing agarose gels, using <sup>32</sup>P labeled PCR fragments as probes. Alternatively, RNAs were separated in urea-polyacrylamide gels (7). In the case of small, putatively noncoding transcripts, <sup>32</sup>P-labelled oligonucleotides (**Table S11**) complementary to a region close to the 5' end were used as probes. Oligonucleotides were labeled using γ-<sup>32</sup>P-ATP and polynucleotide kinase. PCR fragments were <sup>32</sup>P- labeled using a Ready-to-Go DNA-labeling kit (General Electric Healthcare). Hybridization to *mnpB* (8) or *trnL-UAA* was used as a loading and transfer control. Images of radioactive filters were obtained and analyzed using a Cyclone storage phosphor imaging system and OptiQuant image analysis software (Packard). Primer extension analysis of 5' ends was carried out as described previously (9).

**Deep transcriptome sequencing.** The cDNA libraries were prepared by vertis Biotechnologie AG, Germany (<http://www.vertis-biotech.com/>), and analyzed on an Illumina sequencer by Beckman Coulter Genomics, Danvers, MA, as previously described (10). In brief, total RNA was enriched for primary transcripts by treatment with Terminator™ 5'phosphate-dependent exonuclease (Epicentre), which degrades RNAs with a 5'P (processed RNAs) but not primary transcripts with a 5'PPP RNA (10). Then, 5'PPP RNA was cleaved enzymatically using tobacco acid

pyrophosphatase (TAP), a 5'-Solexa RNA linker oligonucleotide (**Table S11**) was ligated to the 5'P of the 'de-capped' RNA and 1<sup>st</sup>-strand cDNA synthesis started using random primers. This treatment reduced the amount of reads for the rRNA operons to 35.3 to 51.7% compared to ~90% previously observed for the same organism (11). The 5'-linkers possessed unique tetranucleotide tags for each of the four libraries (**Table S11**). The 2<sup>nd</sup> strand cDNA synthesis was primed with a biotinylated antisense 5'-Solexa primer, after which cDNA fragments were bound to streptavidin beads. Beads-bound cDNA was blunted and 3' ligated to a Solexa adapter. The cDNA fragments were amplified by 18 - 24 cycles of PCR. For Illumina sequencing (75 bp read length), the cDNAs were pooled in equal amounts and from the pool the cDNA in the size range of 150 - 450 bp was eluted from a preparative agarose gel. A total of 24.312.062 reads was obtained. Based on the tetranucleotide tags, 5.153.094, 4.690.212, 6.398.708 and 5.497.219 from these sequence reads were assigned to the WT-0, the WT-8, the *hetR*-0 and *hetR*-8 populations, respectively, and matched against the sequences of the genome or one of the six large plasmids of *Anabaena* 7120.

**Computational methods.** Sequences of the *Anabaena* 7120 chromosome and plasmids, accession numbers BA000020, BA000019, AP003602, AP003603, AP003604, AP003605, AP003606, were downloaded on the 15th of October 2010 from the NCBI ftp-server. Sequence reads with blast hits to the ribosomal clusters were filtered out, as well as reads <18 nt. Remaining reads were mapped to the genome using the *segemehl* algorithm (12), with default parameters. Output was saved in gff format. Reads were binned within a section of 5 nt, whereby the start of such a window was determined by the first read occurring in 5' to 3' direction. All reads within the 5 nt window were considered to belong to one TSS. When  $\geq 2$  reads were found, all reads within the window were considered to belong to a potential TSS

and the position from where the most reads started as the initial TSS. However, we noticed a few cases of initiation of transcription from a broader window. Therefore, this dataset was clustered, allowing the combination of initial TSS which were not more than 5 nt apart. The position from where the most reads started within this window was assigned as TSS as presented here. All reads starting within this final window would then be counted and given as number of reads associated with this TSS. For the final dataset, we set the minimum number of reads to 50.

**Normalization and ratio calculation.** Numbers of reads associated with a TSS were considered separately for the four different samples. To make the calculation of ratios between pairs of TSS possible for all TSS, single pseudocounts were added to the numbers of reads. If the read sum of the reference and the found matches in the samples reached 50 or more (including pseudocounts) the TSS was included in our investigation (**Table S1**). Normalization was performed according to Robinson and Oshlack 2010 (TMM normalization (13)). The TMM factor calculation was implemented into the TSS annotation pipeline using python 2.6 and used with library size normalization to million base pairs. Trimming for the TMM factor was done with 5% for the absolute intensity (A) and 30% for the log-fold-ratios (M). Ratio values were calculated as  $\log_2$  fold changes:

$$R1) \quad \log_2 \frac{sam(y)/sam(N)}{ref(y)/ref(N)},$$

where y is the number of reads for a chosen TSS and N the effective library size of the respective set (ref=reference, sam=sample). The sample WT-0 was defined as reference to which the other three samples were compared. The resulting ratios were classified and filtered into DEF and DIF categories of regulated promoters as outlined below.

## Filters for classification into DEF and DIF categories of regulated TSS.

A: Reads WT-0

C: Reads WT-8

G: Reads *hetR*-8

T: Reads *hetR*-0

$\text{abs}(X)$  = absolute read value of X

$\log_2 \text{ratio}X$  = normalized M-value between reference and X according to equation R1

General rules were applied to every category filter. In addition, every category had specific rules, which were only applied to that category filter. The category filter is a boolean expression. If a TSS fulfils the conditions of the category filter, it is considered to be part of that category. The variable x sets different thresholds for the DIF/DEF categories (x=3 was used in **Tables S3, S4, S5, S8 and S9**; x=1 in the analysis leading to **Fig. S5B**).

### DIF category

#### General Rules

- 1)  $-1.0 \leq \log_2 \text{ratio}G \leq 1.0$
- 2)  $\text{abs}(A - C) \leq 10$
- 3)  $\text{abs}(\log_2 \text{ratio}C - \log_2 \text{ratio}G) \geq 3.0$
- 4)  $\text{abs}(C - G) \geq 50$
- 5)  $\text{abs}(\log_2 \text{ratio}C - \log_2 \text{ratio}T) \geq 3.0$
- 6)  $\text{abs}(C - T) \geq 50$
- 7)  $\text{abs}(A - T) \geq 10$

#### DIF+ class rules

- 1)  $\log_2 \text{ratio}C \geq x$
- 2)  $\log_2 \text{ratio}C > \log_2 \text{ratio}G$
- 3)  $\log_2 \text{ratio}C > \log_2 \text{ratio}T$

**DIF+ class filter:**  
 [(1 OR 2) OR (3 AND 4)] AND [(5 AND 6) OR 7]  
 AND 8 AND 9 AND 10

### DEF category

#### General Rules

- 1)  $-2.0 \leq \log_2 \text{ratio}T \leq 2.0$

#### DEF+ class rules

- 2)  $\log_2 \text{ratio}C \geq x$
- 3)  $\log_2 \text{ratio}G \geq x$
- 4)  $\log_2 \text{ratio}C - \log_2 \text{ratio}T \geq 2.0$
- 5)  $\log_2 \text{ratio}G - \log_2 \text{ratio}T \geq 2.0$

**DEF+ class filter:**  
 [1 OR (4 AND 5)] AND 2 AND 3

#### DEF- class rules

- 2)  $\log_2 \text{ratio}C \leq x$
- 3)  $\log_2 \text{ratio}G \leq x$
- 4)  $\log_2 \text{ratio}C - \log_2 \text{ratio}T \leq -2.0$
- 5)  $\log_2 \text{ratio}G - \log_2 \text{ratio}T \leq -2.0$

**DEF- class filter:**  
 [1 OR (4 AND 5)] AND 2 AND 3

**Determination of NtcA binding sites and -10 elements.** Possible -10 elements were searched at positions 6-8 nucleotides upstream of all characterized TSS and scored according to a specific PSSM derived from this dataset (**SI Dataset S1, Table S1**). To construct a PSSM for the NtcA binding site, all promoter regions for the 129 TSS in the DEF+ category with at least 8-fold change were aligned. From these, 81 possessed an element matching at least 4 nucleotides of the GTAN<sub>3</sub>TAC motif centered at position 22/23 upstream of the -10 element, and hence were considered useful for construction of the PSSM. Six additional experimentally defined sites included in **Table S2** but not among the 81 sites above were also used in the construction of the matrix.

## **2. SUPPLEMENTARY DATA FILES**

**<http://www.cyanolab.de/Supplementary7120.html>**

**Supplementary data file 1** "Ana7120TSS.gbk". Genbank file of the *Anabaena* 7120 chromosome with all annotated TSS.

**Supplementary data files 2-7** "alpha.gbk" to "zeta.gbk". Genbank files of *Anabaena* 7120 plasmids with all annotated TSS.

**Supplementary data file 8** "Ana7120 tRNAs". The tRNA transcriptome of *Anabaena* 7120.

### 3. SUPPLEMENTARY FIGURES

**Supplementary Figure S1. Details of annotation and classification of the TSS dataset into gTSS giving rise to mRNA, aTSS producing asRNA, iTSS for internal sense transcripts and nTSS for candidate ncRNAs.** (A) A TSS was classified as gTSS if the TSS was located 0-200 nt upstream of a gene. TSS located antisense or  $\leq 50$  bp 5' or 3' of an annotated gene were classified as antisense (aTSS). TSS positioned within a coding sequence were classified as internal TSS (iTSS). TSS not entering any of the previous categories were considered putative ncRNA starts (nTSS). (B) Overlaps between the different categories of TSS. Some TSS associate with multiple categories according to **Fig. S1A**. Thus, 235 of the 4186 gTSS were actually located antisense and 431 were in sense orientation within another annotated gene.

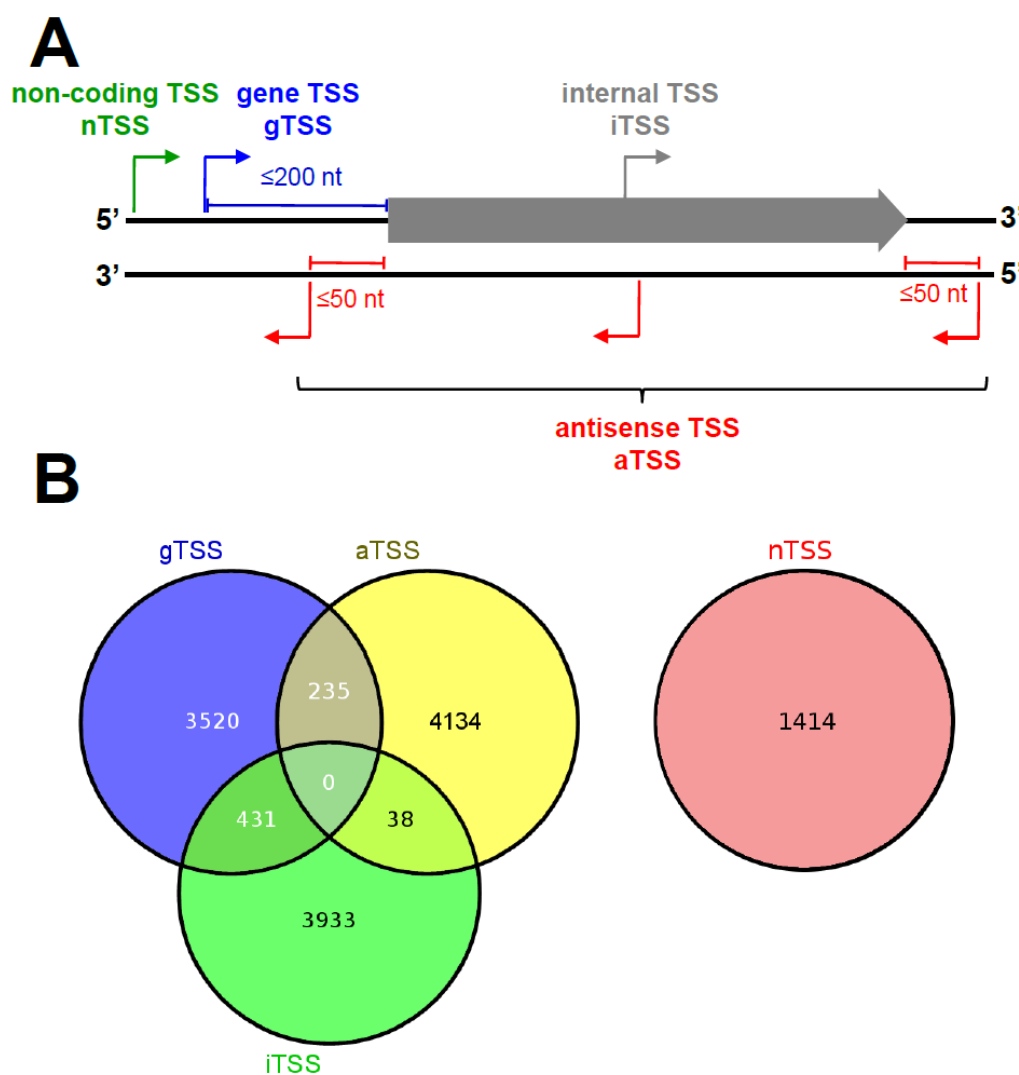



**Supplementary Figure S2. Occurrence of TSS along linear plots of the six *Anabaena* 7120 plasmids.** Each plasmid is drawn along the x-axis and its length indicated in nucleotides. Mapped TSSs for the forward strand are plotted above the main axis and for the reverse strand below. The number of sequence reads is given on the y-axis ( $\log_{10}$  scale). The location of each of the TSS according to **Fig. S1A** served for its classification, color-coded as indicated in the legend.

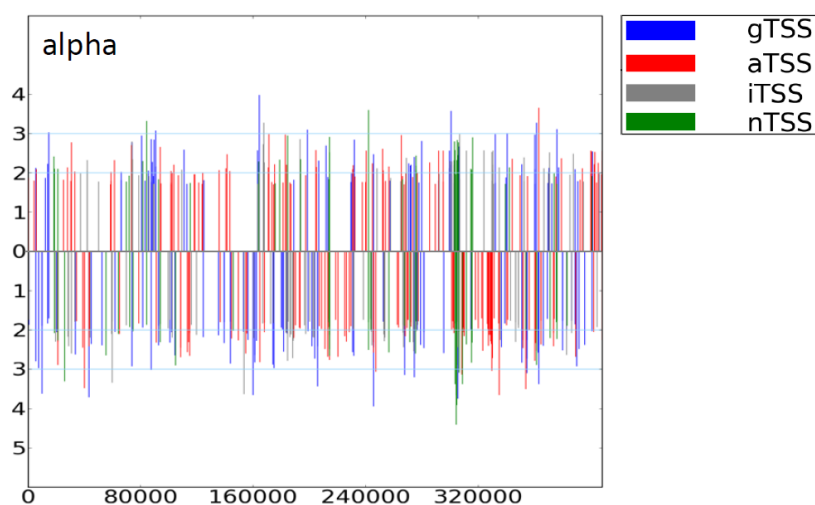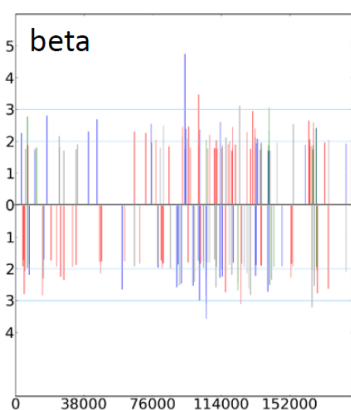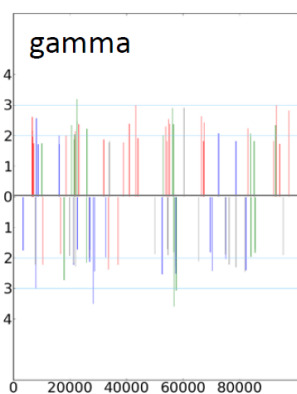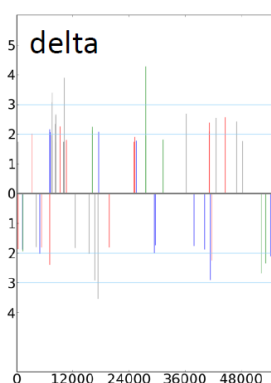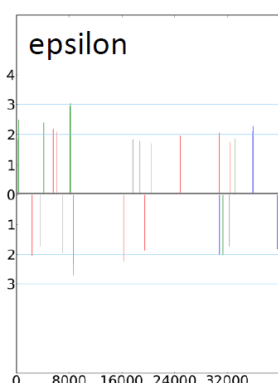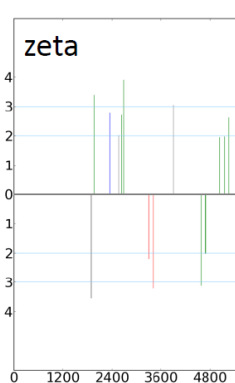

### Supplementary Figure S3. Characterization of the tRNA transcriptome.

(A) Promoter sequence of tRNA genes based on a total of 37 TSS identified for 35 tRNA genes. Consensus -35, -10 and initiation site are represented with a Weblogo. Letter height is proportional to frequency. From the aligned TSS a consensus -10 element was found located 5-8 bp upstream of TSS. A -35 sequence is found in most tRNA genes at 17-19 bp from the -10 sequence. (B) Length of pre-tRNA 5' leader sequences. Length was estimated from the distance between the TSS and the 5'-end of mature tRNA.

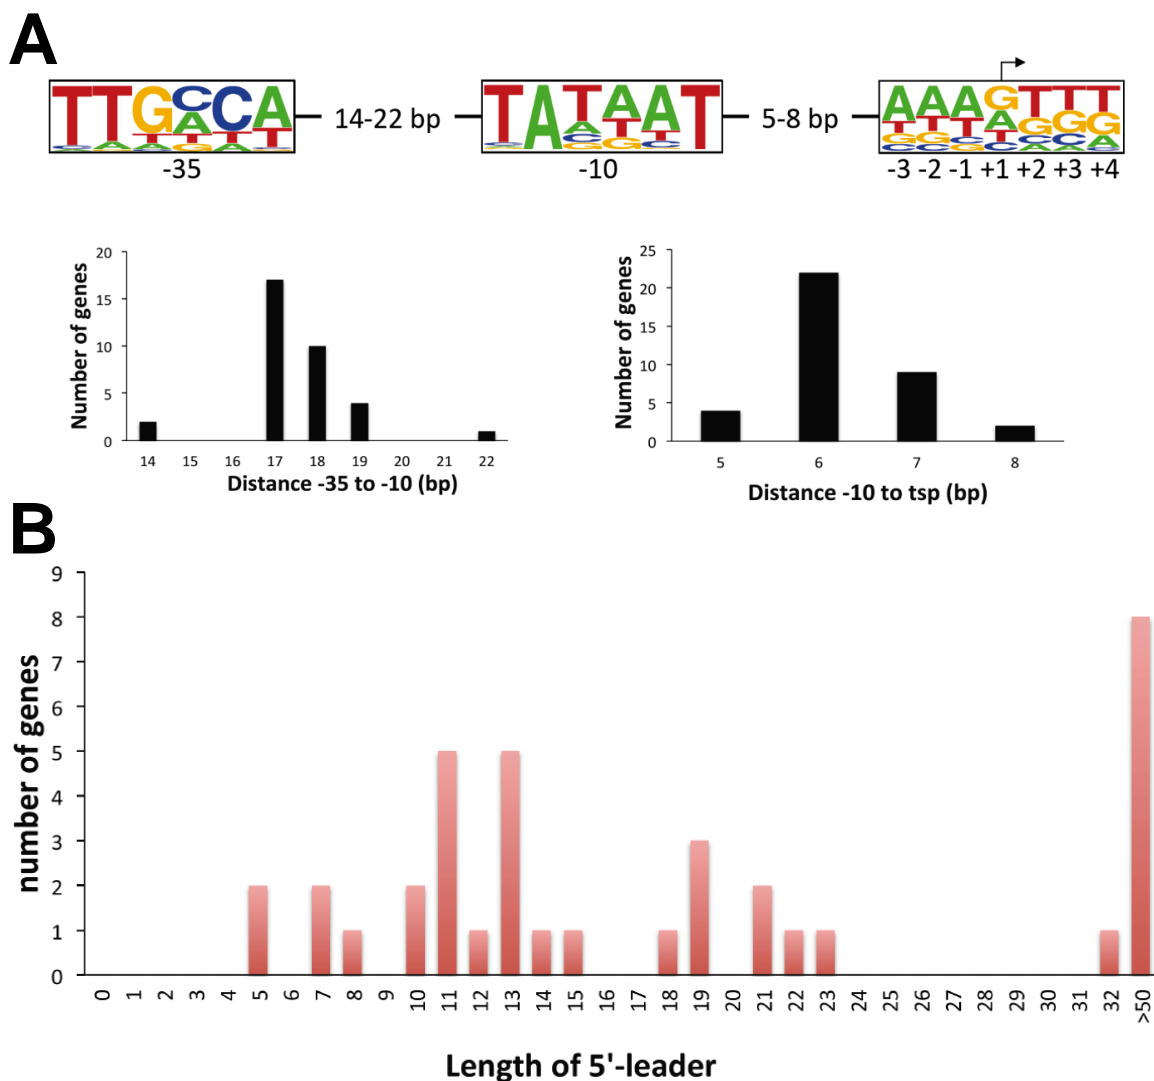

**Supplementary Figure S4. Paradigm promoters in the different categories defined.** Reads associated to several genes with known N- regulation corresponding to the DEF+ (*nirA*, (A)), DEF- (*gifA*, (B)) or DIF+ (genes in the HEP biosynthesis island, (C)) categories (14, 15, 16, 17). The histograms correspond to the WT-0 (red), WT-8 (green), *hetR*-0 (black) and *hetR*-8 (blue) samples. Red triangles in part (C) indicate transposon insertions leading to *fox*<sup>-</sup> phenotype (16, 17). Scales indicate read numbers.

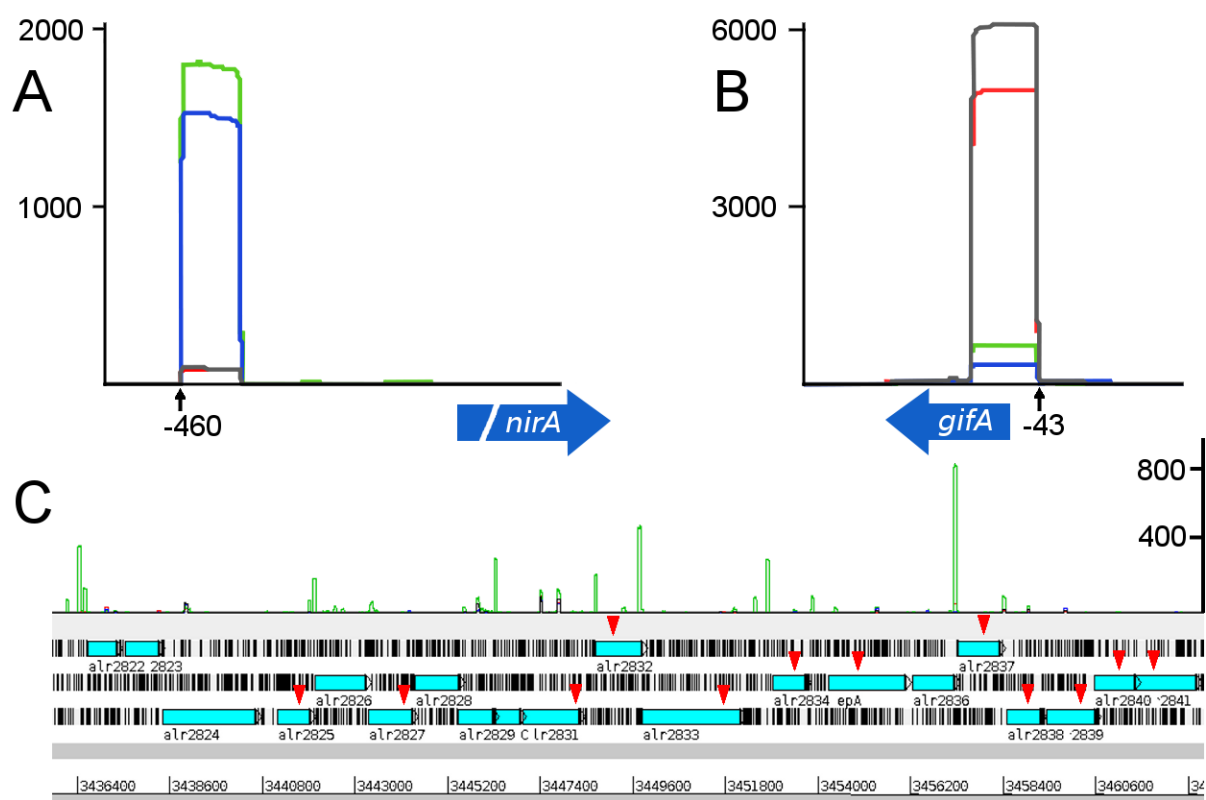

**Supplementary Figure S5.** (A) PSSM obtained from an alignment of sequences for the NtcA binding pattern (positions  $-49$  to  $-36$  with regard to the respective TSS) of 81 putatively NtcA-regulated TSS according to **Table S3** and six additional TSS experimentally characterized before.

(B) Positions (first nucleotide) of NtcA binding sites identified within the promoters of 965 TSS in the DEF+ category (fold change  $\geq 2$ , PSSM score  $\geq 5.0$ ) in a sliding window approach using the PSSM from part (A). The bars indicate the first nucleotide of a putative NtcA binding site and its position with regard to the TSS at position  $+1$ .

### A

|   | -49   | -48   | -47   | -46   | -45   | -44   | -43   | -42   | -41   | -40   | -39   | -38   | -37   | -36   |
|---|-------|-------|-------|-------|-------|-------|-------|-------|-------|-------|-------|-------|-------|-------|
| A | -3.16 | -1.29 | 0.84  | 0.42  | -0.66 | 0.46  | 0.38  | 0.11  | -0.10 | 0.16  | 0.58  | -1.16 | 1.40  | -3.75 |
| C | -4.22 | -2.64 | -1.05 | -1.22 | 1.14  | -0.31 | -0.64 | -0.05 | -0.41 | -0.76 | -0.05 | -0.52 | -1.90 | 2.17  |
| G | 2.20  | -2.64 | -0.52 | 0.24  | -1.05 | -0.52 | -1.05 | -0.13 | 0.24  | 0.82  | -1.90 | -0.76 | -0.76 | -2.64 |
| T | -4.75 | 1.46  | -0.75 | -0.10 | -0.16 | -0.05 | 0.38  | 0.01  | 0.16  | -0.66 | 0.06  | 1.03  | -2.75 | -3.75 |

### B

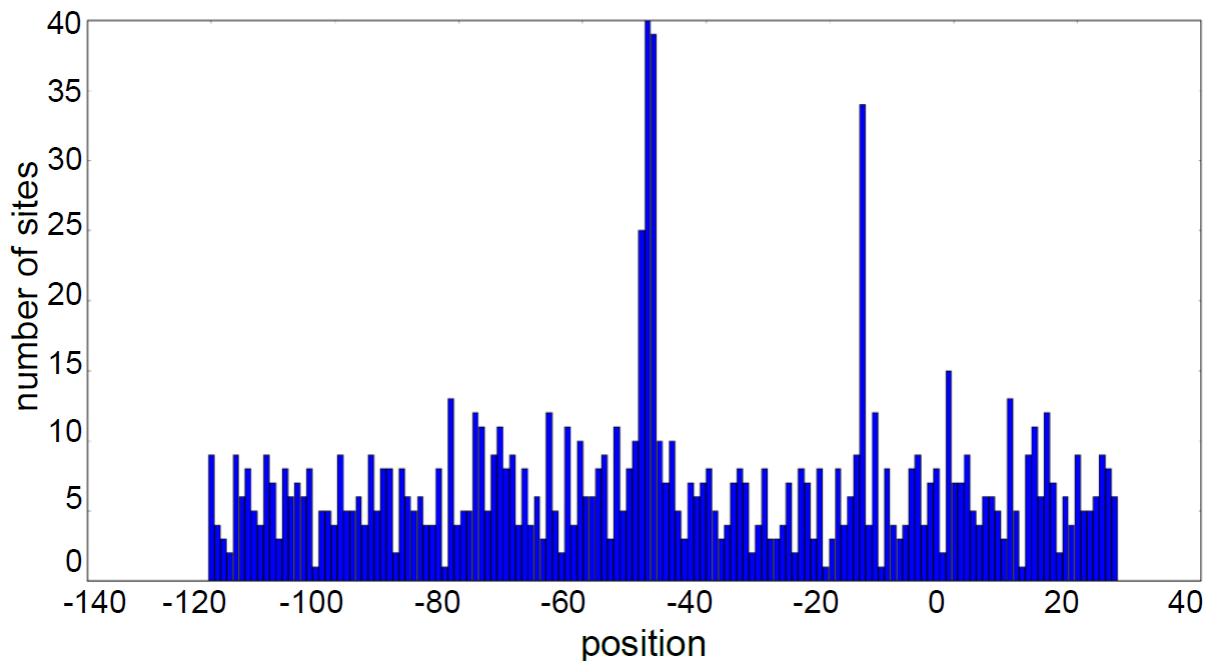

**Supplementary Figure S6. Experimental verification of newly identified transcripts classified as antisense or noncoding.** RNA was isolated from ammonium-grown cells (lanes labeled 0) or from cells incubated in the absence of combined nitrogen for the number of hours indicated. (A) Primer extension analysis of the *all3278* asRNA in *Anabaena* 7120 WT and mutant strains CSE2 (*ntcA*) and 216 (*hetR*). Samples contained 20  $\mu$ g of RNA. (B) Northern blot analysis of ncRNAs NsiR2 (Top) and NsiR3 (Middle) in *Anabaena* 7120 WT and mutant strains CSE2 (*ntcA*) and 216 (*hetR*). Transcription from position 3141905r (DIF+) produces NsiR2, whereas transcription from position 5452083f (DEF+) produces NsiR3. The samples contained 10  $\mu$ g of RNA. The *trnL-UAA* transcript (Bottom) was used as a loading control. (C) Predicted secondary structure of NsiR3, typical for a regulatory RNA.

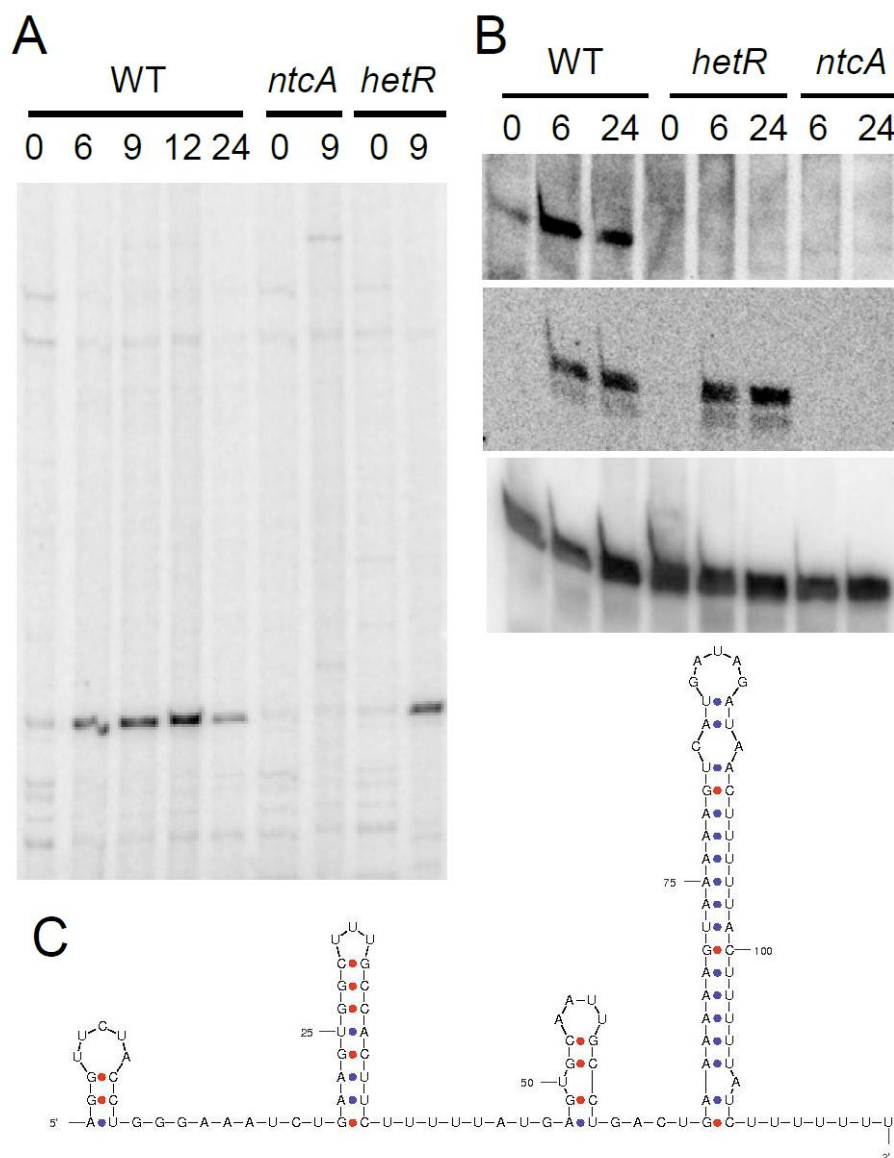

**Supplementary Figure S7. The -10 element of *Anabaena* 7120.** Alignment of sequences for the -10 elements (positions -12 to -7 with regard to the respective TSS) of 13705 experimentally determined putative TSS (**Table S1**) yields the numbers of nucleotides for each position (top), the PSSM (middle) and the resulting sequence logo (bottom).

|   | -12   | -11   | -10  | -9   | -8   | -7    |
|---|-------|-------|------|------|------|-------|
| A | 891   | 12702 | 4516 | 7162 | 7898 | 827   |
| C | 1060  | 320   | 2138 | 1624 | 2513 | 231   |
| G | 1179  | 238   | 1946 | 1967 | 1402 | 413   |
| T | 10575 | 445   | 5105 | 2952 | 1892 | 12234 |

|   | -12   | -11   | -10   | -9    | -8    | -7    |
|---|-------|-------|-------|-------|-------|-------|
| A | -2.18 | 1.65  | 0.16  | 0.82  | 0.97  | -2.29 |
| C | -1.41 | -3.13 | -0.39 | -0.79 | -0.16 | -3.60 |
| G | -1.25 | -3.56 | -0.53 | -0.51 | -1.00 | -2.76 |
| T | 1.39  | -3.18 | 0.34  | -0.45 | -1.10 | 1.60  |

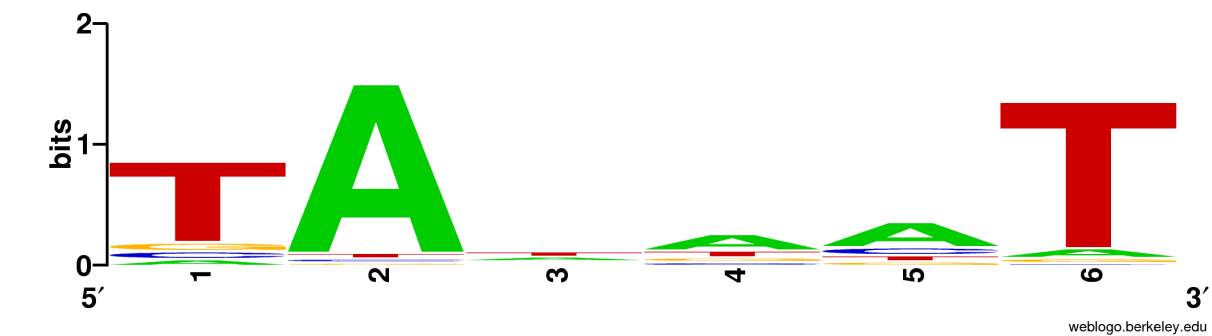



#### **4. SUPPLEMENTARY TABLES**

**Suppl. Table S1. Overview on all putative TSS mapped for the chromosome and plasmids alpha, beta, gamma, delta, epsilon and zeta.** The TSS are classified as gTSS, aTSS, iTSS or nTSS according to the scheme in **Fig. S1A**. The annotation gives the respective gene name or systematic ID, or the TSS position in the genome when both were not available. Sequences in the window -13 to -6 were searched for a possible -10 element and the PSSM score for the hexanucleotide motif scoring highest is given.

See "Suppl. Table S1.xlsx" within the *Dataset S1*



**Suppl. Table S2. Comparison of dRNAseq-anchored TSS with a set of selected previously determined TSS of *Anabaena* 7120.**

The list of genes is in alphabetical order. If the TSS was found, the number of reads (pooled from all four samples) is given (b.t., reads are present but below threshold of 50 reads; n.d., not detected). Gene names and references are given for previously determined TSS, followed by the systematic ID, the TSS position (absolute coordinates; if our mapping differed by a few nt, this position is indicated by the number in brackets), the number of reads, orientation (S; f, forward, r, reverse strand), citation (R) and sequence in a window of 51 nt. If more than one TSS was found, the most distally located was numbered TSS1. The respective -10 elements (or extended -10 elements) and TSS as proposed by the authors are underlined and boldface. TSS and -10 elements as defined by us are highlighted in light gray. Previously proposed NtcA binding sites are double underlined, and commented on if experimentally verified. A, alternative TSS for this gene exist which were not previously identified; DIF or DEF indicate the mode of regulation if applicable (see main text).

| Gene             | ID      | Position          | dRNA-seq        | S | R    | Sequence                                                                      | Comment                                                           |
|------------------|---------|-------------------|-----------------|---|------|-------------------------------------------------------------------------------|-------------------------------------------------------------------|
| <i>apcF</i>      | all2327 | 2807239 (2807238) | (2159)          | r | (18) | gggagaaagttaatctcataggggtcaactttgacat <u><b>taaaat</b></u> ccttaag <b>TA</b>  | DEF-; overlaps with <i>glnA</i> TSS2 (-270; RNA <sub>IV</sub> )   |
| <i>alr0750</i>   | alr0750 | 871876 (871877)   | b.t. (21 reads) | f | (19) | atgatttcccctcacaagttcctcaaattatttctcct <u><b>tataa</b></u> acaataga <b>TA</b> |                                                                   |
| <i>alr1690</i>   | alr1690 | 2018583           | 714             | f | (20) | ctgaaagactatttagaggcaaaccaacgcggtttatggg <u><b>gaaaat</b></u> gtgaat <b>A</b> | Readthrough from this TSS results in an asRNA to <i>furA</i> (20) |
| <i>argC</i>      | all2498 | 2999383           | 156             | r | (21) | atcgatttcggataatttatttttgggtgtccctaagg <u><b>taaaat</b></u> tcagt <b>A</b>    |                                                                   |
| <i>argD</i> TSS1 | alr1080 | 1263707           | n.d.            | f | (21) | ccccggccattaactcttttggatgcggttggtatttctggtcaagagtt <b>G</b>                   |                                                                   |
| <i>argD</i> TSS2 | alr1080 | 1263762 (1263763) | (168)           | f | (21) | aaaattattttccactattgcccacaggtttgaggatata <u><b>taatgt</b></u> taag <b>CT</b>  | +A                                                                |
| <i>atp1</i>      | all0011 | 9641              | 18432           | r | (22) | taattgttttttctaaagtattgttaccggatcgtga <u><b>tatgat</b></u> tcagct <b>G</b>    | +A                                                                |
| <i>asr0689</i>   | asr0689 | 796925 (796926)   | b.t. (16 reads) | f | (23) | ggttattagatgagctaatttgattgacaatcacactc <u><b>tagaat</b></u> tata <b>TA</b>    | +A                                                                |
| <i>atpB</i> TSS1 | all5039 | 6011693           | 1776            | r | (24) | gcagttctctgatgttgtaagtcttaagaatcaattt <u><b>tatgatata</b></u> aaagt <b>TG</b> | +A                                                                |
| <i>atpB</i> TSS2 | all5039 | 6011596 (6011595) | (7483)          | r | (24) | aaggaattactaacggaactctgtccccctccggtgt <u><b>tagagt</b></u> gaaaga <b>TG</b>   | +A                                                                |
| <i>caIA</i> TSS1 | alr0946 | 1099489           | 6626            | f | (25) | atctgtaagttagatttaaaaataaacaactatttt <u><b>tgctatt</b></u> attagtc <b>A</b>   |                                                                   |

|                                              |         |                                |                        |   |            |                                                                                         |                                                                                                             |
|----------------------------------------------|---------|--------------------------------|------------------------|---|------------|-----------------------------------------------------------------------------------------|-------------------------------------------------------------------------------------------------------------|
| <i>calA</i> TSS2                             | alr0946 | 1100046                        | n.d.                   | f | (25)       | ccagtaactttatgcagat <u>tgctaaaa</u> agtcaaatactggcatgagacaac <b>A</b>                   |                                                                                                             |
| <i>cnaT</i>                                  | all0601 | 700173                         | 1097                   | r | (26)       | gtgtctgtgcattatTTTTTgaaattgctataaggta <u>tacgatt</u> agtca <b>A</b>                     |                                                                                                             |
| <i>conR</i>                                  | all0187 | 202508                         | 232                    | r | (27)       | accagccaggattactgggaacaatgggctactcattgttgcatacacac <b>A</b>                             | +A                                                                                                          |
| <i>coxB</i>                                  | alr2514 | 3021024                        | 185                    | f | (28)       | tatctggaataattcccccaatttttataggca <u>taagtt</u> aaaaagttaat <b>A</b>                    | DIF+                                                                                                        |
| <i>cox3</i>                                  | alr2729 | 3327074<br>(3327077)           | (166)                  | f | (29)       | tgttacaattacttttgacaagtactaaaaaaatcct <u>taagct</u> aaata <b>GatA</b>                   | DEF+                                                                                                        |
| <i>cpcB</i>                                  | alr0528 | 620574 (620581)                | (24732)                | f | (30)       | tcacaatttgtaacaaaataaggatctatagca <u>ttgtat</u> aaac <b>At</b> aagct <b>G</b>           | DEF-                                                                                                        |
| <i>cpcD</i>                                  | asr0531 | 622781 (622810)                | n.d.<br>(580)          | f | (30)       | cgcgtctatcgact <u>tagaag</u> tt <b>A</b> ccggaatccgtagccctggctacc <b>ccagT</b>          | iTSS in <i>cpcC</i>                                                                                         |
| <i>cphA1</i> TSS1<br>(-116)                  | all3879 | 4681771 (4681796)              | n.d.<br>(260)          | r | (31)       | aaaaaccagagggt <u>tagact</u> gaatt <b>Gat</b> ctttaattta <u>tttccct</u> gctgta <b>G</b> | TSS reported at pos. -89, -116, -141, -191 and -230 (31)                                                    |
| <i>cphA1</i> TSS2<br>(-32)                   | all3879 | 4681687                        | 1228                   | r | this study | aactgtttttcatgaacagtttagcgatcaattccagtaagaaactagaa <b>T</b>                             | DEF+                                                                                                        |
| <i>cphBA1</i>                                | all3880 | 4683108 (4683126)<br>(4683096) | n.d.<br>(725)<br>(205) | r | (31)       | atztatgtttaaatattgt <b>G</b> acaact <u>taccat</u> tttaata <b>A</b> ataatctaacc <b>A</b> | TSS for <i>cphB1</i> reported at pos. -339, -357 and -499 (31)                                              |
| <i>devBCA</i> TSS1<br>(-704)                 | alr3710 | 4478166/69                     | b.t. (26 reads)        | f | (32)       | at <u>ttgtacag</u> tctgttaccctttacctgaaacagatgaatg <u>tagaat</u> tttat <b>A</b>         | Function of NtcA binding site demonstrated by band shifts and lack of activation in <i>ntcA</i> mutant (32) |
| <i>devBCATSS2</i><br>(-454)                  | alr3710 | 4478416                        | 559                    | f | (33)       | agtcactaagttgcagaaaatctttaaagatttgc <u>cataat</u> gaaatct <b>A</b>                      | DIF+                                                                                                        |
| <i>devH</i> TSS1<br>(-406)                   | alr3952 | 4769438 (4769441)              | 865                    | f | (34)       | tctacctttatatagaggaatTTTTTgctttt <u>tattgt</u> gcttttgctgtt <b>GctG</b>                 |                                                                                                             |
| <i>devH</i> TSS2<br>(-157)                   | alr3952 | 4769698<br>(4769700)           | 8380                   | f | (34)       | ttcgatgaataatatgtaaactttactaccatcattg <u>tacagt</u> aggaa <b>GtA</b>                    |                                                                                                             |
| <i>devH</i> TSS3<br>(-136)                   | alr3952 | 4769709 (4769713)              | (1072)                 | f | (34)       | atgtaaactttactaccatcattg <u>tacagt</u> aggaagtataacaaaa <b>TagtA</b>                    |                                                                                                             |
| <i>devH</i> TSS4<br>(-112)                   | alr3952 | 4769731                        | n.d.                   | f | (34)       | tcattgtacagtaggaagtataacaaaatagtagagcgcaaatagccctc <b>T</b>                             |                                                                                                             |
| <i>furA</i>                                  | all1691 | 2020552                        | 3932                   | r | (20, 35)   | taagcaatgTTTgTTgcaaactcactccaaatatttTgt <u>tattatt</u> ctcaatt <b>A</b>                 |                                                                                                             |
| <i>gifA</i>                                  | asl2329 | 2809313                        | 12036                  | r | (15)       | aatcttcaattccg <u>tagca</u> taagatacagaattcttTgc <u>tattatt</u> aaatgt <b>G</b>         | DEF-;function of NtcA binding site shown by derepression in <i>ntcA</i> mutant (15)                         |
| <i>glnATSS1</i><br>(-319; RNA <sub>v</sub> ) | alr2328 | 2807164<br>(2807166)           | 208                    | f | (36)       | tcgcgcattccttcttctcccaatcttTgctatc <u>tatgg</u> tttgatatt <b>AaT</b>                    |                                                                                                             |
| <i>glnA</i> TSS2                             | alr2328 | 2807208 (2807212)              | 7400                   | f | (2, 36,    | ttaatTTgTTgcactacgcaccagtaaattTTTgTgctattaa <b>aaA</b> tag <b>A</b>                     |                                                                                                             |

|                                              |         |                   |                 |   |             |                                                                               |                                                                                                                           |
|----------------------------------------------|---------|-------------------|-----------------|---|-------------|-------------------------------------------------------------------------------|---------------------------------------------------------------------------------------------------------------------------|
| (-270; RNA <sub>IV</sub> )                   |         |                   |                 |   | 37)         |                                                                               |                                                                                                                           |
| <i>glnA</i> TSS3 (-240)                      | alr2328 | 2807243           | 314             | f | this study  | tttgtgctattaaaaatagattcggcacaaaaacaatc <u>tatctgttactt</u> <b>A</b>           |                                                                                                                           |
| <i>glnA</i> TSS4 (-197; RNA <sub>III</sub> ) | alr2328 | 2807286           | n.d.            | f | (2, 36, 37) | ctgttacaaggattttatgtcaaagttgaccctatgagattaactttct <b>C</b>                    | Discussed as a processed product (2, 37)                                                                                  |
| <i>glnA</i> TSS5 (-155; RNA <sub>II</sub> )  | alr2328 | 2807326 (2807328) | 1209            | f | (2, 36, 37) | aaagaaaggt <u>taatat</u> ttacct <b>G</b> <b>A</b> atccagacgttctgtaacaaagactac | Binding of NtcA to this site activates expression of RNA <sub>I</sub> and represses expression of RNA <sub>II</sub> (36). |
| <i>glnA</i> TSS6 (-93; RNA <sub>I</sub> )    | alr2328 | 2807390 (2807392) | (60)            | f | (2, 36, 37) | <u>gtaacaaagactac</u> aaaactgtctaatgtttagaatc <u>tacgat</u> atttc <b>AgG</b>  | Function of NtcA binding site shown by band shifts and lack of activation in <i>ntcA</i> mutant (36)                      |
| <i>gnd</i> TSS1                              | alr5275 | 6294305 (6294306) | (611)           | f | (18)        | gtgttactagttagcttttattctttaaattaactct <u>taatgt</u> cttctt <b>TA</b>          | <b>DEF+</b> ; +A                                                                                                          |
| <i>gnd</i> TSS2                              | alr5275 | 6294342 (6294343) | 447             | f | (18)        | cttctttaggggagaagagaaaaactcggct <u>taccct</u> taaga <b>T</b> gaaaga <b>A</b>  | Additional gTSS at pos. 6294275, 6294294, 6294349                                                                         |
| <i>gor</i> TSS1                              | all4968 | (5931866)         | 92              | r | this study  | actctctcctcactgaccagaagtattagaaactcgt <u>taccct</u> gtactt <b>G</b>           | iTSS in all4969                                                                                                           |
| <i>gor</i> TSS2                              | all4968 | 5931553 (5931564) | (122)           | r | (38)        | aaccctggaggcggtggatttggtc <b>caaaat</b> gaaaggt <b>A</b> ataggggagg <b>A</b>  |                                                                                                                           |
| <i>gor</i> TSS3                              | all4968 | 5931496           | 217             | r | (38)        | gactgttgacaactgacaattgacaaataacaactgt <u>tacatt</u> aaatatc <b>A</b>          | <b>DEF-</b>                                                                                                               |
| <i>hanA</i> , <i>hupB</i>                    | asr3935 | 4752810 (4752807) | (1309)          | f | (39, 40)    | ggtttcactatccacttctggctacaacaccttagaat <u>gattcat</u> t <b>GaaA</b>           |                                                                                                                           |
| <i>hesA</i>                                  | all1432 | 1693413           | 329             | r | (41)        | tgtaatcagcctgacagaaactatcgtctgattagagggt <b>tataa</b> agt <b>GatcA</b>        | <b>DEF+</b> ; <b>Fig. 4A</b>                                                                                              |
| <i>hetC</i> TSS1 (-571)                      | alr2817 | 3427493/3427492   | b.t. (17 reads) | f | (9, 42)     | tctgtaacatgagatacacaatagcatttatatttgctt <u>tagtat</u> ctct <b>CT</b>          | <b>DEF+</b> ; +A; Function of NtcA binding site shown by band shifts and lack of activation in <i>ntcA</i> mutant(9)      |
| <i>hetC</i> TSS2 (-293)                      | alr2817 | 3427771           | b.t. (22 reads) | f | (33)        | aaaaaataatcttctgatgttttaagaaaattactgttgttataaatt <b>A</b>                     | <b>DIF+</b> ; +A; <b>Fig. 3A</b>                                                                                          |
| <i>hetF</i> (-403)                           | alr3546 | 4273165 (4273166) | 343             | f | (4)         | tgtcttagggaattggtaaatctccctgcccagacag <u>tagaat</u> aatct <b>A</b>            |                                                                                                                           |
| <i>hetP</i> (-557)                           | alr2818 | 3431807           | 72              | f | this study  | attgagtaataaaattctgataacgggtgacattcatg <b>aaaaa</b> agatagt <b>A</b>          | <b>DIF+</b> ; 5'-ends at positions -727, -545, -208, -177 and -12 bp reported (43)                                        |
| <i>hetP</i> (-545)                           | alr2818 | 3431819           | b.t. (25 reads) | f | (43)        | aattctgataacgggtgacattcatg <b>aaaaa</b> agatagtataaataactaat <b>A</b>         | <b>DIF+</b> ;                                                                                                             |
| <i>hetR</i> TSS1 (-728)                      | alr2339 | 2820911           | 859             | f | (42, 44-46) | tttagcaaaagaaaagtttaagagtagattaattcatg <b>caattt</b> taataat <b>A</b>         | <b>DEF+</b>                                                                                                               |
| <i>hetR</i> TSS2 (-696)                      | alr2339 | 2820942           | 1039            | f | (42, 44-46) | ttcatgcaattttaataatgatgacagataaatatagaa <u>tattat</u> gttg <b>A</b>           |                                                                                                                           |

|                             |         |                   |                 |   |                  |                                                        |                                                                                                                       |
|-----------------------------|---------|-------------------|-----------------|---|------------------|--------------------------------------------------------|-----------------------------------------------------------------------------------------------------------------------|
| <i>hetR</i> TSS3 (-271)     | alr2339 | 2821366           | 2030            | f | (42, 44-46)      | agagcagataagttccgataatagggaaagtccttgtaggttacttattA     | DIF+; Fig. 3A                                                                                                         |
| <i>hetR</i> TSS4 (-184)     | alr2339 | 2821454           | 2972            | f | (42, 44-46)      | aatgaggaaattctggcagttatTTTTgtgatttttcggtaagatacaagcA   |                                                                                                                       |
| <i>hetZ</i>                 | alr0099 | 103033            | 575             | f | (47)             | gggtctagcccagcaggtgggattagagaaacatcctgtatggtagggaaA    | DIF+                                                                                                                  |
| <i>hoxU</i>                 | alr0762 | 883760            | b.t. (23 reads) | f | (19)             | tttgatcaaccttcacaagttcctcaaactcttcaccataaactcaaggtG    |                                                                                                                       |
| <i>hoxW</i> TSS2 (-44)      | all0770 | 893532            | n.d.            | r | (48)             | atTTTTctcttacgttaaaagcgggacgatagaaaaaacctcccaaaagcG    |                                                                                                                       |
| <i>hoxW</i> TSS1 (-70)      | all0770 | 893558            | n.d.            | r | (48)             | tctttgtttcctcacgacttctcaaatttttctcttaoagttaaaagcggG    |                                                                                                                       |
| <i>hupW</i> TSS1            | alr1423 | 1686107 (1686109) | b.t. (48 reads) | f | (48)             | cagttaaacatctaccgaatttactggtatTTTTatggtatcatcactCaA    | iTSS in alr1422                                                                                                       |
| <i>hupW</i> TSS2            | alr1423 | 1686708           | b.t. (12 reads) | f | (48)             | gataagaaggcttttaaaatatcctcttacatactccataaactG          |                                                                                                                       |
| <i>hypF</i>                 | alr0694 | 800230            | 325             | f | (23)             | attggttaatgggtggcgatactgctaattctcgggtgtaggagtgaggA     | iTSS in alr0693                                                                                                       |
| <i>hypC</i> ( <i>hupC</i> ) | asr0695 | 802529 (802573)   | (920)           | f | (23)             | aaacagCaatttatccctttaagttaccttttccgataaatatttattgtA    | iTSS in <i>hypF</i>                                                                                                   |
| <i>invB</i>                 | alr0819 | 942823            | 236             | f | (49)             | gtaattattcatattgcatatTTTcacaaaaagttataaattattatttG     | +A                                                                                                                    |
| <i>invB</i>                 | alr0819 | 942989 (942986)   | 128             | f | this study       | tagttccagaacaataatggaacgacagataatctaaaaatatctttA       | DIF+                                                                                                                  |
| <i>invA</i>                 | alr1521 | 1781512           | b.t. (17 reads) | f | (49)             | actaactcccgcgacttaataatcaaaaattctatgtagggtaagagG       |                                                                                                                       |
| <i>nifB</i>                 | all1517 | 1778380 (1778379) | (58)            | r | (50)             | ttccagagatacaaaactgtaatagtcaaagacgactgctataaaatcttaTA  |                                                                                                                       |
| <i>nirA</i> (-460)          | alr0607 | 704217 (704218)   | 3563            | f | (14, 26, 51, 52) | tgtagctacttataactatTTTtacctgagatcccgacataaaccttagaagTA | DEF+; Function of NtcA binding site shown by lack of activation in <i>ntcA</i> mutant and DNase footprinting (14, 51) |
| <i>nrrA</i> TSS1 (-93)      | all4312 | 5167860           | 241             | r | this study       | aacattttgccaacataggttataaaaaaacgtAgaggtaattgtggctag    |                                                                                                                       |
| <i>nrrA</i> TSS2            | all4312 | 5167793 (5167792) | 10919           | r | (53, 54)         | agtaacaaagactacaaaaccttgggcattgggcttgttactttgaaattCA   | DEF+; Function of NtcA binding site shown by band shifts and lack of activation in <i>ntcA</i> mutant (54); Fig. 4A   |
| <i>nsiR1</i>                | -       | 4273242           | 379             | r | (4)              | catctacaactttatccggattggttagcatctgccagaaacagtttaacG    | DIF+; This is repeat 1 of 12; promoters differ for repeats 2-12 (4); cf. Fig. 3A                                      |
| <i>ntcA</i> TSS1 (-262)     | alr4392 | 5265153           | 857             | f | this study       | tagcaaaaatgatgattattaagggcgtTTTTtagaataaaaatgtttgttA   |                                                                                                                       |
| <i>ntcA</i> TSS2 (-242)     | alr4392 | 5265171           | 157             | f | this study       | ttaagggcgtTTTTtagaataaaaatgtttgttatttcttaagatattttcA   |                                                                                                                       |

|                              |         |                   |                 |   |            |                                                       |                                                                                                                                     |
|------------------------------|---------|-------------------|-----------------|---|------------|-------------------------------------------------------|-------------------------------------------------------------------------------------------------------------------------------------|
| <i>ntcA</i> TSS3 (-190/-189) | alr4392 | 5265223 (5265224) | (252)           | f | (55)       | attacttaatTTTTTctgcaaaaaacctgatggtagagaaagtagaagTA    |                                                                                                                                     |
| <i>ntcA</i> TSS4 (-180)      | alr4392 | 5265235           | 674             | f | (42, 55)   | TTTTctgcaaaaaacctgatggtagagaaagtagaagtatctatcaagaA    | <b>DIF+</b>                                                                                                                         |
| <i>ntcA</i> TSS5 (-136)      | alr4392 | 5265277           | 667             | f | (42)       | tatcaagaactgctagctaaaaatagcaaaagttgggtatcatatgaacA    |                                                                                                                                     |
| <i>ntcA</i> TSS6 (-49)       | alr4392 | 5265364 (5265365) | (62)            | f | (42, 55)   | acagaaaggttaacggtgctttattgatttttcaggttattcttaggtAA    |                                                                                                                                     |
| <i>ntcB</i>                  | all0602 | 701249            | 1339            | r | (51)       | ctgtaacaaaatctaccaaattggggagcaaaatcagctaaacttaattgaA  | <b>DEF+</b> ; Function of NtcA binding site shown by band shifts and lack of activation in <i>ntcA</i> mutant (51)                  |
| <i>patA</i> TSS1 (-616)      | all0521 | 614365            | 131             | r | (56)       | tttataatattTTTTtatttgcctagataaaattggagttaacctagcttttA | <b>DIF+</b>                                                                                                                         |
| <i>patA</i> TSS2 (-306)      | all0521 | 614055            | 91              | r | this study | tgggtttgagccaataactatactgtagtagtacttaaggtactgttagattA |                                                                                                                                     |
| <i>patS</i> (-314)           | asl2301 | 2771367           | n.d.            | r | (57)       | tttacagagataatccaaggaataggtcaataagaataacaatggtgcaaA   | +A                                                                                                                                  |
| <i>patS</i> (-254)           | asl2301 | 2771307           | b.t. (40 reads) | r | this study | gactttaccagtagttagctgatttaataaaagctgctgtaagccttatcA   | +A; TSS depends on HetR                                                                                                             |
| <i>patS</i> (-39)            | asl2301 | 2771092           | n.d.            | r | (57)       | tgatgagaagatgcaatcgtagctaactctcagtagatggaaaaagtaaccA  | +A                                                                                                                                  |
| <i>pepC</i>                  | all4861 | 5791362 (5791334) | (50)            | r | (58)       | agtatgggttctggtttataactCtttatctgaatctgctaatttatatccA  |                                                                                                                                     |
| <i>petC</i> TSS1             | all0606 | 704177            | 249             | r | (14)       | cgatttcgatacttctaagggttatgtcgggatctcaggtaaaaatagtataA | +A                                                                                                                                  |
| <i>petC</i> TSS2             | all0606 | 704059            | 474             | r | this study | aactaatgagtagctaaaaatggttggtaaaacaaggctagacttttgtttA  |                                                                                                                                     |
| <i>petFT</i> TSS1            | all4148 | 4992903           | 27332           | r | (40, 59)   | gtggtggatttcaagttatatacttgatttttctcgtagtatcagaaTTG    | <b>DEF-</b>                                                                                                                         |
| <i>petFT</i> TSS2            | all4148 | 4992835           | 4495            | r | (40)       | tggctaatacccctgagaatagccgccagttttgcttagcataaacttatA   |                                                                                                                                     |
| <i>petH</i> TSS1 (-188)      | all4121 | 4965738           | 2251            | r | (60)       | tgactcattattaacattctccacgagacttatctctaaagttagaaggtG   | +A; Function of NtcA binding site shown by band shifts and lack of activation in <i>ntcA</i> mutant(60)                             |
| <i>petH</i> TSS2 (-63)       | all4121 | 4965613           | 9649            | r | (60)       | ctttctcagagtgctagtttttagtaacgaaaaatccgataaactaaagctG  | <b>DEF+</b> ; +A; derepression in <i>hetR-0</i>                                                                                     |
| <i>pipX</i> TSS1 (-436)      | asr0485 | 580291 (580293)   | (335)           | f | (61)       | ctgtagcaatgcagactgttggtagaacagttattagggagaatgcgctG    | <b>DEF+</b> ; Function of NtcA binding site shown by footprinting and lack of activation in <i>ntcA</i> mutant (61); <b>Fig. 4A</b> |
| <i>pipX</i> TSS2 (-388)      | asr0485 | 580339 (580341)   | (125)           | f | (61)       | ctgtgggctatTTTgctccaacgaaggataaattatggcaacatggagaGaA  | <b>DIF+</b>                                                                                                                         |
| <i>pipX</i> TSS3             | asr0485 | 580620 (580621)   | 543             | f | (61)       | aggatgagatcaaggtctttacaagctccatttaagggtaaaatttgcctGA  |                                                                                                                                     |

|                         |         |                      |                 |   |              |                                                       |                                                                                 |
|-------------------------|---------|----------------------|-----------------|---|--------------|-------------------------------------------------------|---------------------------------------------------------------------------------|
| (-107)                  |         |                      |                 |   |              |                                                       |                                                                                 |
| <i>pipX</i> TSS4 (-53)  | asr0485 | 580674               | 167             | f | this study   | ctcacctgactttatgcaaatattctggcacaagaggattattattgtccgaA |                                                                                 |
| <i>pipX</i> TSS5 (-23)  | asr0485 | 580704               | 350             | f | this study   | caagaggtattattgtccgaatatttgtccttctactgcaaaaaaattatA   | <b>DIF+; Fig. 3A</b>                                                            |
| <i>psbA1</i>            | alr4866 | 5796834              | 21544           | f | (62)         | catgggttttttagtctagtaaatttgcgtgaattcatgtaaattttatgaG  |                                                                                 |
| <i>psbB</i> TSS1        | all0138 | 143582<br>(143579)   | (575)           | r | (40, 63)     | aaacatacgttaggataacttgtaacggcgatctgtgggaagataaaagCctA |                                                                                 |
| <i>psbB</i> TSS2        | all0138 | 143518<br>(143512)   | (5420)          | r | (40, 63)     | atcaatggacacgcttgcaaacggttccatcaatagttacactttTttaaaA  |                                                                                 |
| <i>rbcL</i> TSS1 (-504) | alr1524 | 1785464 (1785466)    | (2865)          | f | (40, 64, 65) | ctttcaagaataacttatgcccatttcttgaatatattgtgagACAagttac  | <b>DEF-; NtcA binding site corroborated by band shift and footprinting (64)</b> |
| <i>rbcL</i> TSS2 (-25)  | alr1524 | 1785945              | 3987            | f | this study   | agggcaattgtgagaggaaattgtacaaaacgtgatttgataagtaaaaA    | <b>DEF-</b>                                                                     |
| <i>rnpB</i>             | -       | 4950813              | 98738           | r | (8)          | agaaataagcaaaacagacacaagacaccaacgaagattacactggagctA   |                                                                                 |
| <i>sigA</i> TSS1 (-868) | all5263 | 6279707              | 105             | r | (66)         | atctgtaatttttaaatgtcaaagtccttttgaattgatataaatatcggttG |                                                                                 |
| <i>sigA</i> TSS2 (-800) | all5263 | 6279640 (6279639)    | (147)           | r | (66)         | ttgtcaagattcagaggttgaaaaatctcgccgatacgcataatgtgaaTA   |                                                                                 |
| <i>sigA</i> TSS3 (-605) | all5263 | 6279444              | 57              | r | (66)         | gacctattcaattctccggactaatttatttatgaaggaaatgtaaaaatG   | <b>DIF+</b>                                                                     |
| <i>sigA</i> TSS4 (-592) | all5263 | 6279431              | n.d.            | r | (66)         | ctccggactaatttatttatgaaggaaatgtaaaaaatgggtgcttcataA   |                                                                                 |
| <i>sigA</i> TSS5 (-328) | all5263 | 6279167              | 2221            | r | (66)         | ttaacacacaaaaagagtgcaatttctgtgaaacaggctacaatcggaagA   | <b>DEF-</b>                                                                     |
| <i>sigC</i>             | all1692 | 2022661              | 4572            | r | (67, 68)     | aaattagaaaatcgtcaggaaattacttatatacccatgtagatgtgactA   | <b>DIF+; Fig. 3A</b>                                                            |
| <i>spsB</i> TSS1        | all4376 | 5242942              | 1067            | r | (69)         | tcgtagtatgtatataacaatctttgacatattaatataaatataagattA   |                                                                                 |
| <i>spsB</i> TSS2        | all4376 | 5242903              | 55              | r | (69)         | aaataaagattactcaacggttcctacataattcccgcataatagtggtgtcA |                                                                                 |
| <i>urtA</i>             | all1951 | 2335160(2335159)     | b.t. (10 reads) | r | (70)         | agtatcaaaaataacaattcaatggttaaatatcaaacataatcacaaTC    |                                                                                 |
| <i>woxA, psbO</i>       | all3854 | 4652357<br>(4652355) | (1857)          | r | (40, 71)     | agaccagaagtgtctttgattttgagttaaaaaaatcgatatgatctggCtG  |                                                                                 |

**Suppl. Table S3. List of TSS corresponding to the DEF+ class with a normalized ratio (M value) of at least  $\log_2 3$**

See "Suppl. Table S3.xlsx" within the *Dataset S1*

**Suppl. Table S4. List of TSS corresponding to the DEF- class with a normalized ratio (M value) of at least  $\log_2 3$**

See "Suppl. Table S4.xlsx" within the *Dataset S1*

**Suppl. Table S5. List of TSS corresponding to the DIF+ class with a normalized ratio (M value) of at least  $\log_2 3$**

See "Suppl. Table S5.xlsx" within the *Dataset S1*

**Suppl. Table S6. Selection of newly identified strongly regulated TSS of genes with known N-dependent regulation or previously described role in heterocyst differentiation.** The annotation gives the respective gene name and systematic ID, followed by the TSS position and classification. For every TSS, the absolute numbers of reads are given for the four samples, followed by the strand information (f, forward; r, reverse strand), comments and references.

| Gene        | ID      | TSS Position                     | Reads WT-0 | Reads WT-8  | Reads hetR-0 | Reads hetR-8 | S | Comment                                                                                                                                                                                                                                | Ref.                   |
|-------------|---------|----------------------------------|------------|-------------|--------------|--------------|---|----------------------------------------------------------------------------------------------------------------------------------------------------------------------------------------------------------------------------------------|------------------------|
| all2006     | all2006 | 2400767 (DEF+)<br>2400640 (DEF+) | 26<br>172  | 3762<br>954 | 133<br>166   | 3181<br>599  | r | Expression inducible upon nitrogen deprivation (Northern hybridization); <b>Fig. 4A</b>                                                                                                                                                | (72)                   |
| all4160     | all4160 | 5007675 (DIF+)                   | 13         | 172         | 1            | 3            | r | Polysaccharide synthesis                                                                                                                                                                                                               | (73)                   |
| all4388     | all4388 | 5261815 (DIF+)                   | 163        | 1011        | 15           | 21           | r | Polysaccharide synthesis                                                                                                                                                                                                               | (74, 75)               |
| alr2826     | alr2826 | 3441875 (DIF+)<br>3441999 (DIF+) | 2<br>3     | 73<br>187   | 9<br>5       | 2<br>1       | f | HEP biosynthesis island;<br>expression inducible upon nitrogen deprivation (microarray, Northern hybridization)                                                                                                                        | (16);<br>(72)          |
| alr2832     | alr2832 | 3448677 (DIF+)                   | 1          | 208         | -            | -            | f | HEP biosynthesis island;<br>expression inducible upon nitrogen deprivation (microarray, Northern hybridization)                                                                                                                        | (16);<br>(72)          |
| alr2833     | alr2833 | 3449710 (DIF+)                   | 2          | 467         | 1            | 1            | f | HEP biosynthesis island;<br>expression inducible upon nitrogen deprivation (microarray, Northern hybridization); <b>Fig. 3A</b>                                                                                                        | (16);<br>(72)          |
| alr2834     | alr2834 | 3452463 (DIF+)<br>3452765 (DIF+) | 1<br>1     | 86<br>286   | -<br>-       | -<br>4       | f | HEP biosynthesis island                                                                                                                                                                                                                | (16)                   |
| alr2837     | alr2837 | 3457231 (DIF+)                   | 52         | 800         | 1            | 9            | f | HEP biosynthesis island; <b>Fig. 3A</b>                                                                                                                                                                                                | (16)                   |
| alr2838     | alr2838 | 3458381 (DIF+)                   | 16         | 85          | 21           | 21           | f | HEP biosynthesis island                                                                                                                                                                                                                | (16)                   |
| <i>amt1</i> | alr0991 | 1158166<br>1158228               | 134<br>234 | 236<br>667  | 122<br>163   | 148<br>184   | f | Expression inducible upon nitrogen deprivation (Northern hybridization)                                                                                                                                                                | (76)                   |
| <i>amt4</i> | alr0990 | 1156305                          | 32         | 215         | 9            | 44           | f | Expression inducible upon nitrogen deprivation (Northern hybridization)                                                                                                                                                                | (76)                   |
| asr1734     | asr1734 | 2086181 (DIF+)                   | 17         | 972         | 49           | 97           | f | -                                                                                                                                                                                                                                      | (77)                   |
| DPS         | alr3808 | 4601709 (DIF+)<br>4601982 (DEF+) | 11<br>56   | 252<br>1006 | 1<br>100     | 1<br>887     | f | Differentially expressed in response to N-deficiency (shotgun proteomics and Northern hybridization). FurA binds to the promoter in a region located between both TSS. Transcripts confirmed here by Northern ( <b>Figs. 2A, 3A</b> ). | (53, 78,<br>79)        |
| <i>glnB</i> | all2319 | 2793917 (DEF+)                   | 5          | 675         | 39           | 357          | r | Expression inducible upon nitrogen deprivation (Northern hybridization)                                                                                                                                                                | (80)                   |
| <i>hepA</i> | alr2835 | 3453831/32 (DIF+)                | 1          | 94          | -            | -            | f | Expression inducible upon nitrogen step-down;<br>HEP biosynthesis island;<br>one TSS previously described within the coding sequence; <b>Fig.</b>                                                                                      | (81);<br>(16);<br>(17) |



|             |         |                |     |      |     |     |   | <b>3A</b>                                                                                                                                               |          |
|-------------|---------|----------------|-----|------|-----|-----|---|---------------------------------------------------------------------------------------------------------------------------------------------------------|----------|
| <i>hepB</i> | alr3698 | 4465653 (DIF+) | 1   | 113  | -   | -   | f | HEP biosynthesis                                                                                                                                        | (73)     |
| <i>hepN</i> | alr0117 | 119143 (DIF+)  | 59  | 216  | 46  | 41  | f | -                                                                                                                                                       | (82, 83) |
| <i>hepS</i> | all2760 | 3357699 (DIF+) | 5   | 516  | 6   | 2   | r | Required for heterocyst maturation                                                                                                                      | (83, 84) |
| <i>hetL</i> | all3740 | 4517099        | 2   | 51   | 5   | 21  | r | Overexpression stimulates heterocyst formation                                                                                                          | (85)     |
| <i>hetN</i> | alr5358 | 6401829        | 35  | 288  | 6   | 67  | f | Inducible upon nitrogen deficiency                                                                                                                      | (86)     |
|             |         | 6401935        | 6   | 17   | 21  | 18  |   |                                                                                                                                                         |          |
| <i>hgdD</i> | alr2887 | 3524849        | 19  | 387  | 6   | 5   | f | -                                                                                                                                                       | (75, 87) |
| <i>nblA</i> | asr4517 | 5407066 (DEF+) | -   | 195  | 8   | 214 | f | Expression of <i>nblA</i> is inducible upon nitrogen deprivation (Northern hybridization).<br>TSS confirmed here by primer extension ( <b>Fig. 2A</b> ) | (88)     |
|             |         | 5407159 (DEF+) | 54  | 584  | 30  | 594 |   |                                                                                                                                                         |          |
|             |         | 5407261 (DEF+) | 5   | 68   | 7   | 49  |   |                                                                                                                                                         |          |
|             |         | 5407310        | 13  | 44   | 7   | 6   |   |                                                                                                                                                         |          |
|             |         | 5407397 (DEF+) | 73  | 1530 | 101 | 735 |   |                                                                                                                                                         |          |
| <i>nirB</i> | all0605 | 703698 (DEF+)  | 40  | 173  | 29  | 168 | r | Expression inducible upon nitrogen deprivation (Northern hybridization)                                                                                 | (14)     |
| <i>patB</i> | all2512 | 3019637        | -   | 22   | 2   | 3   | r | Heterocyst-specific expression                                                                                                                          | (89)     |
| <i>pbpB</i> | alr5101 | 6077335        | 44  | 252  | 33  | 37  | f | Required for heterocyst maturation                                                                                                                      | (90)     |
| <i>pknE</i> | alr3732 | 4506698 (DIF+) | 321 | 1155 | 113 | 171 | f | Overexpression blocks heterocyst development                                                                                                            | (91)     |
| <i>rfbC</i> | alr2830 | 3446301 (DIF+) | 4   | 298  | 1   | 1   | f | HEP biosynthesis island                                                                                                                                 | (16)     |

**Suppl. Table S7. List of promoters with a possible DIF+ class element at position -35.**

See "Suppl. Table S7.xlsx" within the *Dataset S1*

**Suppl. Table S8. Possible NtcA binding sites for TSS in the DEF+ class with a normalized ratio (M value) of at least  $\log_2 3$**

See "Suppl. Table S8.xlsx" within the *Dataset S1*

**Suppl. Table S9. Possible NtcA binding sites for chromosomally located TSS in the DEF- class with a normalized ratio (M value) of at least  $\log_2 3$**

See "Suppl. Table S9.xlsx" within the *Dataset S1*

**Supplementary Table S10. Comparison of the transcriptome dataset with regulon predictions from bioinformatics analyses.**

Comparison to the RegPrecise prediction (92) for the NtcA regulon (28 operons, 37 genes). The table displays the respective predicted operon or gene, as listed in the RegPrecise database, the position of the RegPrecise motif relative to the first nt of the coding region, the RegPrecise motif sequence in 5' to 3' orientation, the locus-tag, the TSS position found in this work with position relative to the coding region/ absolute coordinates (c, TSS is on reverse strand; additional TSS described in the literature in non-boldface letters). We moreover give the position of the RegPrecise NtcA motif relative to the TSS found in this work (bold letters in TSS column) and the numbers of sequence reads for the different conditions/strains mapped to the respective TSS (b.t., below threshold of 50 reads; n.d., no TSS identified in our dataset).

We found 14 from 28 sites in our DEF tables but only those with a fold change of >8 were considered sufficient for a redesign of the NtcA binding site (**Fig. 4**). However, many strongly regulated TSS in the DEF category are missing in the RegPrecise database despite exhibiting consensus NtcA binding sites. In fact only one (*nrrA*) of the eighteen NtcA binding sites upstream from TSS exhibiting highest fold change in the DEF+ category (included in Fig. 4A) is predicted in RegPrecise.

| RegPrecise prediction           | Motif distance to gene | Motifs           | Locus   | TSS (relative / absolute)    | Motif to TSS | Reads WT-0h<br>WT-8h<br>216-8h<br>216-0h | Comments                                                                                                                                           |
|---------------------------------|------------------------|------------------|---------|------------------------------|--------------|------------------------------------------|----------------------------------------------------------------------------------------------------------------------------------------------------|
| <i>urtA-urtB-urtC-urtD-urtE</i> | -116                   | AGTATCAAAAATAACA | all1951 | <b>-67/2335160c</b> ,<br>-79 | -49          | b.t.                                     | NtcA activated promoter previously described (70) and confirmed in our dataset by 10 reads (below the applied cutoff of 50), cf. <b>Table S2</b> . |
| <i>rbcL-rbcX-rbcS</i>           | -32                    | AGTAAAAAGAGTGACA | alr1524 | <b>-25/1785945</b>           | -7           | 1442<br>732<br>760<br>1053               | Repressed TSS at 1785945 identified here as DEF- (see <b>Table S2</b> ). NtcA binding site located at a repression-compatible position.            |
| <i>gor</i>                      | -48                    | AATAACAAGTGTACA  | all4968 | <b>-23/5931496c</b> ,<br>-91 | -25          | 72<br>47<br>28                           | Repressed TSS at 5931496c previously described (38) and confirmed in our dataset as DEF- (see <b>Table S2</b> ). NtcA binding site located at a    |

|                      |              |                                      |         |                                     |              |                            |                                                                                                                                                                                                                                                |
|----------------------|--------------|--------------------------------------|---------|-------------------------------------|--------------|----------------------------|------------------------------------------------------------------------------------------------------------------------------------------------------------------------------------------------------------------------------------------------|
|                      |              |                                      |         |                                     |              | 70                         | repression-compatible position.                                                                                                                                                                                                                |
| <i>amt1</i>          | -50          | TGTAACAAAGTATAACA                    | alr0992 |                                     |              | n.d.                       | Renamed <i>amtB</i> (76). No TSS identified in our dataset.                                                                                                                                                                                    |
| <i>amt1</i>          | -250         | TGTATTAACAAATACA                     | alr0990 | <b>-202/1156305</b>                 | -48          | 32<br>215<br>44<br>9       | Renamed <i>amt4</i> (76). A DEF+ TSS at 1156305 identified in our dataset (see <b>Table S6</b> ). NtcA binding site located at consensus position for activated promoters.                                                                     |
| SYNPCC7002_<br>A0076 | -107         | CGTATAGCAAAATACA                     | asr0064 | <b>-112/69876</b>                   | +6           | 3473<br>588<br>870<br>1265 | Repressed TSS at 69876 identified in our dataset ( <b>Table S1</b> ). NtcA binding site located at a repression-compatible position.                                                                                                           |
| SYNPCC7002_<br>A2395 | -64          | GGTAGTCCGAGTTACA                     | alr4308 | <b>-13/5164427,</b><br>-140         | -51          | 58<br>509<br>1095<br>44    | Activated TSS at 5164427 identified in our dataset (DEF+, <b>Table S1</b> ). NtcA binding site located at consensus position for activated promoters                                                                                           |
| SYNPCC7002_<br>A1954 | -250         | TGTAGTGATAGCTACA                     | alr3982 |                                     |              | n.d.                       | No TSS identified in our dataset. NtcA binding sites likely corresponds to the promoter for the divergent all3981.                                                                                                                             |
| <i>gifA</i>          | -78          | CGTAGCATAAGATACA                     | asl2329 | <b>-40/2809313c</b>                 | -38          | 4999<br>631<br>283<br>6123 | NtcA-repressed TSS at 2809313 previously described (15) and confirmed in our dataset as DEF- (see <b>Table S2 and S4</b> ). NtcA binding site located at a repression-compatible position as shown in <b>Fig. 4E</b> .                         |
| <i>glnA</i>          | -142         | TGTAACAAAGACTACA                     | alr2328 | <b>-155/2807328,</b><br>-91/2807392 | +14          | 725<br>44<br>22<br>418     | TSS located at 2807392 and 2807328 previously described (36) and confirmed in our dataset ( <b>Table S2</b> ). NtcA binding site located at a repression-compatible position with respect to TSS at position 2807328 (DEF-, <b>Table S4</b> ). |
| <i>glnB</i>          | -214         | AGTTACACAGACTACA                     | all2319 | <b>-89/2793917c,</b><br>-29,-61,-71 | -125         | 5<br>675<br>357<br>39      | Activated TSS at 2793917 identified in our dataset as DEF+ (see <b>Table S1, S3 and S6</b> ). NtcA binding site not located at expected consensus position as shown in <b>Fig. 4A</b> .                                                        |
| <i>ndh</i>           | -146         | TGTAGCTTAAATTACT                     | all1127 | <b>-41/1324785c</b>                 | -105         | 2<br>20<br>28<br>1         | Activated TSS at 1324785 identified in our dataset ( <b>Table S1</b> ). NtcA binding site not located at expected consensus position                                                                                                           |
| <i>nrrA</i>          | -75          | AGTAACAAAGACTACA                     | all4312 | <b>-25/5167792c,</b><br>-93         | -50          | 58<br>5560<br>5115<br>186  | NtcA-activated TSS at position 5167792, previously described (54) and confirmed in our dataset ( <b>Fig. 4A</b> ). NtcA binding site located at consensus position for activated promoters as shown in <b>Fig. 4A</b> .                        |
| <i>ntcA</i>          | -151<br>-111 | GGTATCATTATGAACA<br>AGTATAGGAAAGTACA | alr4392 | <b>-48/5265365,</b><br>-30          | -103,<br>-63 | 1<br>33<br>6               | Both NtcA binding sites located at non-consensus positions with respect to TSS at 5265365, confirmed in our dataset, and required for induction (fully                                                                                         |

|                       |             |                                       |         |                                |             |                               |                                                                                                                                                                                                                          |
|-----------------------|-------------|---------------------------------------|---------|--------------------------------|-------------|-------------------------------|--------------------------------------------------------------------------------------------------------------------------------------------------------------------------------------------------------------------------|
|                       |             |                                       |         |                                |             | 22                            | analyzed in (93)).                                                                                                                                                                                                       |
| <i>ntcB</i>           | -80,<br>-21 | TGTAACAAAATCTACC,<br>TGTAATTAAGGCTACA | all0602 | <b>-31/701249</b>              | -49,<br>+11 | 9<br>427<br>880<br>23         | NtcA-activated TSS at position 701249, previously described (51) and confirmed in our dataset. NtcA binding site 1 located at consensus position for activated promoters, the second at a repression-compatible position |
| SYNPCC7002_<br>A0264  | -52         | CGTAGTGTATGTTACA                      | all1327 | <b>+1/1577077</b>              | -52         | 52<br>377<br>304<br>52        | Activated TSS at 1577077 identified in our dataset ( <b>Table S1</b> ). NtcA binding site located at consensus position for activated promoters.                                                                         |
| <i>coxB-coxA-coxC</i> | -291        | AGAAGTAGAAGCTACT                      | alr2514 | <b>-174/3021024</b>            | -117        | 4<br>166<br>10<br>5           | Activated TSS at position 3021024 previously described (28) and confirmed in our dataset (DIF+, <b>Tables S1 and S5</b> ).                                                                                               |
| <i>fur</i>            | -218        | TGTAGCTTGAGATTCA                      | all1691 | <b>-26/2020552c</b>            | -192        | 421<br>673<br>1617<br>1221    | TSS at position 2020552 previously described (35) and confirmed in our dataset ( <b>Tables S1 and S2</b> ). We are not aware of evidences supporting a function for this NtcA binding site.                              |
| <i>alr1690</i>        | -91         | TGTGAATATAGAAACA                      | alr1690 | <b>-84/2018583,<br/>-157</b>   | -7          | 362<br>117<br>119<br>116      | TSS at position 2018583 previously described (20) and confirmed in our dataset ( <b>Tables S1 and S2</b> ). We are not aware of evidences supporting a function for this NtcA binding site.                              |
| <i>isiA</i>           | -37         | AGTATTTCTGGCAACA                      | all4001 | <b>-131/4820249c</b>           | +95         | 24396<br>1775<br>697<br>25692 | Repressed TSS at position 4820249 identified in our dataset as DEF- (see <b>Table S1 and S4</b> ). We are not aware of evidences supporting a function for this NtcA binding site.                                       |
| <i>psbZ</i>           | -161        | TGTTACAAAAATTAGG                      | all1258 | <b>-22/1493584c,<br/>-5</b>    | -139        | 3428<br>1096<br>1650<br>4810  | Repressed TSS at position 1493584 identified in our dataset as DEF- ( <b>Table S1</b> ). We are not aware of evidences supporting a function for this NtcA binding site.                                                 |
| <i>gltS</i>           | -265        | TGGAAAAATTTAAAACA                     | alr4344 |                                |             | n.d.                          | No TSS identified in our dataset.                                                                                                                                                                                        |
| <i>nifJ</i>           | -281        | TGAATTTGATGTAACC                      | alr1911 |                                |             | n.d.                          | No TSS identified in our dataset.                                                                                                                                                                                        |
| <i>ndhF-ndhD</i>      | -260        | TGTCTTATAAAATACA                      | alr4156 | <b>-122/4999494</b>            | -138        | 42<br>20<br>47<br>27          | TSS at position 4999494 identified in our dataset. We are not aware of evidences supporting a function for this NtcA binding site.                                                                                       |
| <i>hanA</i>           | -279        | GGTATTTTTTCCTACT                      | asr3935 | <b>-147/4752807,<br/>-7</b>    | -132        | 581<br>103<br>519<br>106      | TSS at position 4752807 previously described (39) and confirmed in our dataset ( <b>Tables S1 and S2</b> ). We are not aware of evidences supporting a function for this NtcA binding site.                              |
| <i>trxA</i>           | 17          | AGTTACAGATTCTACT                      | alr0052 | <b>-12/56630,<br/>-36, -43</b> | +29         | 12<br>17<br>10                | We are not aware of evidences supporting a function for this NtcA binding site, located within the reading frame.                                                                                                        |

|             |      |                  |         |                              |      |                           |                                                                                                                           |
|-------------|------|------------------|---------|------------------------------|------|---------------------------|---------------------------------------------------------------------------------------------------------------------------|
|             |      |                  |         |                              |      | 20                        |                                                                                                                           |
| <i>apcF</i> | -233 | TGTAGTCTTTGTTACA | all2327 | <b>-115/2807238c,</b><br>-29 | -118 | 1042<br>179<br>316<br>622 | This NtcA binding site is actually regulating the divergent <i>glnA</i> promoter (see above).                             |
| <i>icd</i>  | -6   | TGAAATATGTACAACA | alr1827 | <b>-161/2192172,</b><br>-229 | +155 | 25<br>16<br>28<br>38      | We are not aware of evidences supporting a function for this NtcA binding site, that actually overlaps the reading frame. |

**Supplementary Table S11. List of oligonucleotides.** Sequences are given in 5'→3' orientation.

See "Suppl. Table S11.xlsx" within the *Dataset S1*

## **5. SUPPLEMENTARY MATERIAL REFERENCES**

1. Buikema WJ, Haselkorn R (1991) Characterization of a gene controlling heterocyst differentiation in the cyanobacterium *Anabaena* 7120. *Genes & Development* 5:321-330.
2. Frías JE, Flores E, Herrero A (1994) Requirement of the regulatory protein NtcA for the expression of nitrogen assimilation and heterocyst development genes in the cyanobacterium *Anabaena* sp. PCC7120. *Mol Microbiol* 14:823-832.
3. Rippka R, Deruelles J, B. WJ, Herdmann M, Stanier RY (1979) Generic assignments, strain histories and properties of pure cultures of cyanobacteria. *J Gen Microbiol* 111:1-61.
4. Ionescu D, Voss B, Oren A, Hess WR, Muro-Pastor AM (2010) Heterocyst-specific transcription of NsiR1, a non-coding RNA encoded in a tandem array of direct repeats in cyanobacteria. *J Mol Biol* 398:177-188.
5. Mohamed A, Jansson C (1989) Influence of light on accumulation of photosynthesis-specific transcripts in the cyanobacterium *Synechocystis* 6803. *Plant Mol Biol* 13:693-700.
6. Ausubel FM (2011) *Current Protocols in Molecular Biology* (John Wiley & Sons, Inc., Hoboken, NJ).
7. Steglich C, *et al.* (2008) The challenge of regulation in a minimal photoautotroph: non-coding RNAs in *Prochlorococcus*. *PLoS Genet* 4:e1000173.
8. Vioque A (1992) Analysis of the gene encoding the RNA subunit of ribonuclease P from cyanobacteria. *Nucleic Acids Res* 20:6331-6337.
9. Muro-Pastor AM, Valladares A, Flores E, Herrero A (1999) The *hetC* gene is a direct target of the NtcA transcriptional regulator in cyanobacterial heterocyst development. *J Bacteriol* 181:6664-6669.
10. Sharma CM, *et al.* (2010) The primary transcriptome of the major human pathogen, *Helicobacter pylori*. *Nature* 464:250-255.
11. Flaherty BL, Van Nieuwerburgh F, Head SR, Golden JW (2011) Directional RNA deep sequencing sheds new light on the transcriptional response of *Anabaena* sp. strain PCC 7120 to combined-nitrogen deprivation. *BMC Genomics* 12:332.
12. Hoffmann S, *et al.* (2009) Fast mapping of short sequences with mismatches, insertions and deletions using index structures. *PLoS Comput Biol* 5:e1000502.
13. Robinson MD, Oshlack A (2010) A scaling normalization method for differential expression analysis of RNA-seq data. *Genome Biol* 11:R25.
14. Frías JE, Flores E, Herrero A (1997) Nitrate assimilation gene cluster from the heterocyst-forming cyanobacterium *Anabaena* sp. strain PCC 7120. *J Bacteriol* 179:477-486.
15. Galmozzi CV, Saelices L, Florencio FJ, Muro-Pastor MI (2010) Posttranscriptional regulation of glutamine synthetase in the filamentous

- cyanobacterium *Anabaena* sp. PCC 7120: differential expression between vegetative cells and heterocysts. *J Bacteriol* 192:4701-4711.
16. Huang G, *et al.* (2005) Clustered genes required for the synthesis of heterocyst envelope polysaccharide in *Anabaena* sp. strain PCC 7120. *J Bacteriol* 187:1114-1123.
  17. Zhu J, Kong R, Wolk CP (1998) Regulation of *hepA* of *Anabaena* sp. strain PCC 7120 by elements 5' from the gene and by *hepK*. *J Bacteriol* 180:4233-4242.
  18. Curtis SE, Martin JA (1994) The transcription apparatus and the regulation of transcription initiation. *The molecular biology of cyanobacteria*, eds Bryant DA (Kluwer Academic Publishers, Dordrecht, The Netherlands), pp 613-639.
  19. Sjöholm J, Oliveira P, Lindblad P (2007) Transcription and regulation of the bidirectional hydrogenase in the cyanobacterium *Nostoc* sp. strain PCC 7120. *Appl Environ Microbiol* 73:5435-5446.
  20. Hernández JA, *et al.* (2006) Identification of a *furA* cis antisense RNA in the cyanobacterium *Anabaena* sp. PCC 7120. *J Mol Biol* 355:325-334.
  21. Floriano B, Herrero A, Flores E (1994) Analysis of expression of the *argC* and *argD* genes in the cyanobacterium *Anabaena* sp. strain PCC 7120. *J Bacteriol* 176:6397-6401.
  22. McCarn DF, Whitaker RA, Alam J, Vrba JM, Curtis SE (1988) Genes encoding the alpha, gamma, delta, and four F0 subunits of ATP synthase constitute an operon in the cyanobacterium *Anabaena* sp. strain PCC 7120. *J Bacteriol* 170:3448-3458.
  23. Agervald A, Stensjö K, Holmqvist M, Lindblad P (2008) Transcription of the extended *hyp*-operon in *Nostoc* sp. strain PCC 7120. *BMC Microbiol* 8:69.
  24. Curtis SE (1987) Genes encoding the beta and epsilon subunits of the proton-translocating ATPase from *Anabaena* sp. strain PCC 7120. *J Bacteriol* 169:80-86.
  25. Agervald A, Zhang X, Stensjö K, Devine E, Lindblad P (2010) CalA, a cyanobacterial AbrB protein, interacts with the upstream region of *hypC* and acts as a repressor of its transcription in the cyanobacterium *Nostoc* sp. strain PCC 7120. *Appl Environ Microbiol* 76:880-890.
  26. Frías JE, Herrero A, Flores E (2003) Open reading frame *all0601* from *Anabaena* sp. strain PCC 7120 represents a novel gene, *cnaT*, required for expression of the nitrate assimilation *nir* operon. *J Bacteriol* 185:5037-5044.
  27. Mella-Herrera RA, Neunuebel MR, Golden JW (2011) *Anabaena* sp. strain PCC 7120 *conR* contains a LytR-CpsA-Psr domain, is developmentally regulated, and is essential for diazotrophic growth and heterocyst morphogenesis. *Microbiology* 157:617-626.
  28. Valladares A, Herrero A, Pils D, Schmetterer G, Flores E (2003) Cytochrome c oxidase genes required for nitrogenase activity and diazotrophic growth in *Anabaena* sp. PCC 7120. *Mol Microbiol* 47:1239-1249.
  29. Herrero A, Muro-Pastor AM, Valladares A, Flores E (2004) Cellular differentiation and the NtcA transcription factor in filamentous cyanobacteria. *FEMS Microbiol Rev* 28:469-487.
  30. Belknap WR, Haselkorn R (1987) Cloning and light regulation of expression of the phycocyanin operon of the cyanobacterium *Anabaena*. *EMBO J* 6:871-884.
  31. Picossi S, Valladares A, Flores E, Herrero A (2004) Nitrogen-regulated genes for the metabolism of cyanophycin, a bacterial nitrogen reserve polymer: expression and mutational analysis of two cyanophycin synthetase and



- cyanophycinase gene clusters in heterocyst-forming cyanobacterium *Anabaena* sp. PCC 7120. *J Biol Chem* 279:11582-11592.
32. Fiedler G, Muro-Pastor AM, Flores E, Maldener I (2001) NtcA-dependent expression of the *devBCA* operon, encoding a heterocyst-specific ATP-binding cassette transporter in *Anabaena* spp. *J Bacteriol* 183:3795-3799.
  33. Muro-Pastor AM, Flores E, Herrero A (2009) NtcA-regulated heterocyst differentiation genes *hetC* and *devB* from *Anabaena* sp. strain PCC 7120 exhibit a similar tandem promoter arrangement. *J Bacteriol* 191:5765-5774.
  34. Hebbar PB, Curtis SE (2000) Characterization of *devH*, a gene encoding a putative DNA binding protein required for heterocyst function in *Anabaena* sp. strain PCC 7120. *J Bacteriol* 182:3572-3581.
  35. Hernández JA, *et al.* (2006) Interaction of FurA from *Anabaena* sp. PCC 7120 with DNA: a reducing environment and the presence of Mn(2+) are positive effectors in the binding to *isiB* and *furA* promoters. *Biometals* 19:259-268.
  36. Valladares A, Muro-Pastor AM, Herrero A, Flores E (2004) The NtcA-dependent P1 promoter is utilized for *glnA* expression in N<sub>2</sub>-fixing heterocysts of *Anabaena* sp. strain PCC 7120. *J Bacteriol* 186:7337-7343.
  37. Tumer NE, Robinson SJ, Haselkorn R (1983) Different promoters for the *Anabaena* glutamine synthetase gene during growth using molecular or fixed nitrogen. *Nature* 306:337-342.
  38. Jiang F, Hellman U, Sroga GE, Bergman B, Mannervik B (1995) Cloning, sequencing, and regulation of the glutathione reductase gene from the cyanobacterium *Anabaena* PCC 7120. *J Biol Chem* 270:22882-22889.
  39. Nagaraja R, Haselkorn R (1994) Protein HU from the cyanobacterium *Anabaena*. *Biochimie* 76:1082-1089.
  40. Schneider GJ, Lang JD, Haselkorn R (1991) Promoter recognition by the RNA polymerase from vegetative cells of the cyanobacterium *Anabaena* 7120. *Gene* 105:51-60.
  41. Borthakur D, Basche M, Buikema WJ, Borthakur PB, Haselkorn R (1990) Expression, nucleotide sequence and mutational analysis of two open reading frames in the *nif* gene region of *Anabaena* sp. strain PCC7120. *Mol Gen Genet* 221:227-234.
  42. Muro-Pastor AM, Valladares A, Flores E, Herrero A (2002) Mutual dependence of the expression of the cell differentiation regulatory protein HetR and the global nitrogen regulator NtcA during heterocyst development. *Mol Microbiol* 44:1377-1385.
  43. Higa KC, Callahan SM (2010) Ectopic expression of *hetP* can partially bypass the need for *hetR* in heterocyst differentiation by *Anabaena* sp. strain PCC 7120. *Mol Microbiol* 77:562-574.
  44. Buikema WJ, Haselkorn R (2001) Expression of the *Anabaena hetR* gene from a copper-regulated promoter leads to heterocyst differentiation under repressing conditions. *Proc Natl Acad Sci USA* 98:2729-2734.
  45. Ehira S, Ohmori M (2006) NrrA directly regulates expression of *hetR* during heterocyst differentiation in the cyanobacterium *Anabaena* sp. strain PCC 7120. *J Bacteriol* 188:8520-8525.
  46. Rajagopalan R, Callahan SM (2010) Temporal and spatial regulation of the four transcription start sites of *hetR* from *Anabaena* sp. strain PCC 7120. *J Bacteriol* 192:1088-1096.
  47. Zhang W, *et al.* (2007) A gene cluster that regulates both heterocyst differentiation and pattern formation in *Anabaena* sp. strain PCC 7120. *Mol Microbiol* 66:1429-1443.

48. Devine E, Holmqvist M, Stensjo K, Lindblad P (2009) Diversity and transcription of proteases involved in the maturation of hydrogenases in *Nostoc punctiforme* ATCC 29133 and *Nostoc* sp. strain PCC 7120. *BMC Microbiol* 9:53.
49. Vargas W, Nishi C, Giarrocco L, Salerno G (2011) Differential roles of alkaline/neutral invertases in *Nostoc* sp. PCC 7120: Inv-B isoform is essential for diazotrophic growth. *Planta* 233:153-162.
50. Mulligan ME, Haselkorn R (1989) Nitrogen fixation (*nif*) genes of the cyanobacterium *Anabaena* species strain PCC 7120. The *nifB-fdxN-nifS-nifU* operon. *J Biol Chem* 264:19200-19207.
51. Frías JE, Flores E, Herrero A (2000) Activation of the *Anabaena nir* operon promoter requires both NtcA (CAP family) and NtcB (LysR family) transcription factors. *Mol Microbiol* 38:613-625.
52. Frías JE, Flores E (2010) Negative regulation of expression of the nitrate assimilation *nirA* operon in the heterocyst-forming cyanobacterium *Anabaena* sp. strain PCC 7120. *J Bacteriol* 192:2769-2778.
53. Ehira S, Ohmori M (2006) NrrA, a nitrogen-responsive response regulator facilitates heterocyst development in the cyanobacterium *Anabaena* sp. strain PCC 7120. *Mol Microbiol* 59:1692-1703.
54. Muro-Pastor AM, Olmedo-Verd E, Flores E (2006) All4312, an NtcA-regulated two-component response regulator in *Anabaena* sp. strain PCC 7120. *FEMS Microbiol Lett* 256:171-177.
55. Ramasubramanian TS, Wei TF, Oldham AK, Golden JW (1996) Transcription of the *Anabaena* sp. strain PCC 7120 *ntcA* gene: multiple transcripts and NtcA binding. *J Bacteriol* 178:922-926.
56. Young-Robbins SS, Risser DD, Moran JR, Haselkorn R, Callahan SM (2010) Transcriptional regulation of the heterocyst patterning gene *patA* from *Anabaena* sp. strain PCC 7120. *J Bacteriol* 192:4732-4740.
57. Yoon HS, Golden JW (2001) PatS and products of nitrogen fixation control heterocyst pattern. *J Bacteriol* 183:2605-2613.
58. Luinenburg I, Coleman JR (1992) Identification, characterization and sequence analysis of the gene encoding phosphoenolpyruvate carboxylase in *Anabaena* sp. PCC 7120. *J Gen Microbiol* 138:685-691.
59. Alam J, Whitaker RA, Krogmann DW, Curtis SE (1986) Isolation and sequence of the gene for ferredoxin I from the cyanobacterium *Anabaena* sp. strain PCC 7120. *J Bacteriol* 168:1265-1271.
60. Valladares A, Muro-Pastor AM, Fillat MF, Herrero A, Flores E (1999) Constitutive and nitrogen-regulated promoters of the *petH* gene encoding ferredoxin:NADP<sup>+</sup> reductase in the heterocyst-forming cyanobacterium *Anabaena* sp. *FEBS Lett* 449:159-164.
61. Valladares A, et al. (2011) Specific role of the cyanobacterial PipX factor in the heterocysts of *Anabaena* sp. strain PCC 7120. *J Bacteriol* 193:1172-1182.
62. Vrba J, Curtis S (1989) Characterization of a four-member *psbA* gene family from the cyanobacterium *Anabaena* PCC 7120. *Plant Mol Biol* 14:81-92.
63. Lang JD, Haselkorn R (1989) Isolation, sequence and transcription of the gene encoding the photosystem II chlorophyll-binding protein, CP-47, in the cyanobacterium *Anabaena* 7120. *Plant Mol Biol* 13:441-457.
64. Ramasubramanian TS, Wei TF, Golden JW (1994) Two *Anabaena* sp. strain PCC 7120 DNA-binding factors interact with vegetative cell- and heterocyst-specific genes. *J Bacteriol* 176:1214-1223.

65. Nierzwicki-Bauer SA, Curtis SE, Haselkorn R (1984) Cotranscription of genes encoding the small and large subunits of ribulose-1,5-bisphosphate carboxylase in the cyanobacterium *Anabaena* 7120. *Proc Natl Acad Sci USA* 81:5961-5965.
66. Brahamsha B, Haselkorn R (1991) Isolation and characterization of the gene encoding the principal sigma factor of the vegetative cell RNA polymerase from the cyanobacterium *Anabaena* sp. strain PCC 7120. *J Bacteriol* 173:2442-2450.
67. Brahamsha B, Haselkorn R (1992) Identification of multiple RNA polymerase sigma factor homologs in the cyanobacterium *Anabaena* sp. strain PCC 7120: cloning, expression, and inactivation of the *sigB* and *sigC* genes. *J Bacteriol* 174:7273-7282.
68. Aldea MR, Mella-Herrera RA, Golden JW (2007) Sigma factor genes *sigC*, *sigE*, and *sigG* are upregulated in heterocysts of the cyanobacterium *Anabaena* sp. strain PCC 7120. *J Bacteriol* 189:8392-8396.
69. Cumino AC, Marcozzi C, Barreiro R, Salerno GL (2007) Carbon cycling in *Anabaena* sp. PCC 7120. Sucrose synthesis in the heterocysts and possible role in nitrogen fixation. *Plant Physiol* 143:1385-1397.
70. Valladares A, Montesinos ML, Herrero A, Flores E (2002) An ABC-type, high-affinity urea permease identified in cyanobacteria. *Mol Microbiol* 43:703-715.
71. Borthakur D, Haselkorn R (1989) Nucleotide sequence of the gene encoding the 33 kDa water oxidizing polypeptide in *Anabaena* sp. strain PCC 7120 and its expression in *Escherichia coli*. *Plant Mol Biol* 13:427-439.
72. Ehira S, Ohmori M, Sato N (2003) Genome-wide expression analysis of the responses to nitrogen deprivation in the heterocyst-forming cyanobacterium *Anabaena* sp. strain PCC 7120. *DNA Res* 10:97-113.
73. Wang Y, *et al.* (2007) Predicted glycosyl transferase genes located outside the HEP island are required for formation of heterocyst envelope polysaccharide in *Anabaena* sp. strain PCC 7120. *J Bacteriol* 189:5372-5378.
74. Lechno-Yossef S, Fan Q, Wojciuch E, Wolk CP (2011) Identification of ten *Anabaena* sp. genes that, under aerobic conditions, are required for growth on dinitrogen but not for growth on fixed nitrogen. *J Bacteriol* 193:3482-3489.
75. Maldener I, Hannus S, Kammerer M (2003) Description of five mutants of the cyanobacterium *Anabaena* sp strain PCC 7120 affected in heterocyst differentiation and identification of the transposon-tagged genes. *FEMS Microbiol Lett* 224:205-213.
76. Paz-Yepes J, Merino-Puerto V, Herrero A, Flores E (2008) The *amt* gene cluster of the heterocyst-forming cyanobacterium *Anabaena* sp. strain PCC 7120. *J Bacteriol* 190:6534-6539.
77. Wu X, Lee DW, Mella RA, Golden JW (2007) The *Anabaena* sp. strain PCC 7120 *asr1734* gene encodes a negative regulator of heterocyst development. *Mol Microbiol* 64:782-794.
78. Hernández JA, Pellicer S, Huang L, Peleato ML, Fillat MF (2007) FurA modulates gene expression of *alr3808*, a DpsA homologue in *Nostoc* (*Anabaena*) sp. PCC7120. *FEBS Lett* 581:1351-1356.
79. Ow SY, *et al.* (2008) Quantitative shotgun proteomics of enriched heterocysts from *Nostoc* sp. PCC 7120 using 8-plex isobaric peptide tags. *J Proteome Res* 7:1615-1628.
80. Paz-Yepes J, Flores E, Herrero A (2009) Expression and mutational analysis of the *glnB* genomic region in the heterocyst-forming cyanobacterium *Anabaena* sp. strain PCC 7120. *J Bacteriol* 191:2353-2361.

81. Holland D, Wolk CP (1990) Identification and characterization of *hetA*, a gene that acts early in the process of morphological differentiation of heterocysts. *J Bacteriol* 172:3131-3137.
82. Ning D, Xu X (2004) *alr0117*, a two-component histidine kinase gene, is involved in heterocyst development in *Anabaena* sp. PCC 7120. *Microbiology* 150:447-453.
83. Lechno-Yossef S, Fan Q, Ehira S, Sato N, Wolk CP (2006) Mutations in four regulatory genes have interrelated effects on heterocyst maturation in *Anabaena* sp. strain PCC 7120. *J Bacteriol* 188:7387-7395.
84. Fan Q, *et al.* (2006) Signal transduction genes required for heterocyst maturation in *Anabaena* sp. strain PCC 7120. *J Bacteriol* 188:6688-6693.
85. Liu D, Golden JW (2002) *hetL* overexpression stimulates heterocyst formation in *Anabaena* sp. strain PCC 7120. *J Bacteriol* 184:6873-6881.
86. Callahan SM, Buikema WJ (2001) The role of HetN in maintenance of the heterocyst pattern in *Anabaena* sp. PCC 7120. *Mol Microbiol* 40:941-950.
87. Moslavac S, *et al.* (2007) A TolC-like protein is required for heterocyst development in *Anabaena* sp. strain PCC 7120. *J Bacteriol* 189:7887-7895.
88. Baier K, Lehmann H, Stephan DP, Lockau W (2004) NblA is essential for phycobilisome degradation in *Anabaena* sp. strain PCC 7120 but not for development of functional heterocysts. *Microbiology* 150:2739-2749.
89. Jones KM, Buikema WJ, Haselkorn R (2003) Heterocyst-specific expression of *patB*, a gene required for nitrogen fixation in *Anabaena* sp. strain PCC 7120. *J Bacteriol* 185:2306-2314.
90. Lázaro S, Fernández-Piñas F, Fernández-Valiente E, Blanco-Rivero A, Leganés F (2001) *pbpB*, a gene coding for a putative penicillin-binding protein, is required for aerobic nitrogen fixation in the cyanobacterium *Anabaena* sp. strain PCC7120. *J Bacteriol* 183:628-636.
91. Saha SK, Golden JW (2011) Overexpression of *pknE* blocks heterocyst development in *Anabaena* sp. strain PCC 7120. *J Bacteriol* 193:2619-2629.
92. Novichkov PS, *et al.* (2010) RegPrecise: a database of curated genomic inferences of transcriptional regulatory interactions in prokaryotes. *Nucleic Acids Res* 38:D111-118.
93. Olmedo-Verd E, Valladares A, Flores E, Herrero A, Muro-Pastor AM (2008) Role of two NtcA-binding sites in the complex *ntcA* gene promoter of the heterocyst-forming cyanobacterium *Anabaena* sp. strain PCC 7120. *J Bacteriol* 190:7584-7590.
